# Supplementary material for: Designing symmetrically folded scaffolds of pyridazinone and triazinone derivatives linked via N , N -diethyl-4-nitro-benzenesulfonamide to explore luminescent materials
Source: Royal Society of Chemistry journal article supplement (doi:10.1039/d4tc04436c), 2025-01-01
Supplement: d4tc04436c1.pdf [file d4tc04436c1.pdf]

## Electronic Supplementary information

### Designing symmetrically folded scaffolds of pyridazinone and triazinone derivatives linked Via N, N-diethyl-4-nitro-benzenesulfonamide: to explore luminescent materials

Vipin Kumar<sup>[a]</sup>, Krishanu Bandyopadhyay<sup>[a]</sup>, Manisha Nidhar<sup>[b]</sup>, Vishal Prasad Sharma<sup>[a]</sup>, Priyanka Yadav<sup>[a]</sup>, Suman Gill<sup>[a]</sup>, Priyanka sonker<sup>[a]</sup>, Abhineet Verma<sup>[c]</sup>, Satyen Saha\*<sup>[a]</sup>, Ashish Kumar Tewari\*<sup>[a]</sup>

<sup>[a]</sup>Department of Chemistry, Institute of Science, Banaras Hindu University, Varanasi, Uttar Pradesh-221005, India,

<sup>[b]</sup>Amrita School of Pharmacy, Amrita Vishwa, Vidhyapeetham, AIMS, Health Science Campus, Kochi-682041, India

<sup>[c]</sup>Department of Chemistry, Malviya National Institute of Technology Jaipur-302017, India

E-mail: ashishtewarichem@gmail.com, satyen.saha@gmail.com

#### Contents

- Experimental
- Copies of <sup>1</sup>H NMR and <sup>13</sup>C NMR spectra
- Crystallographic details
- Hirshfeld Surface Analysis
- TD DFT calculations of DP, DT, DPM, and DTM
- Photophysical study
- References

#### Experimental Section

##### General information

All the reagents were purchased from Sigma Aldrich and were used without further purification. Reactions were conducted at an ambient temperature and monitored by thin-layer chromatography (TLC) over silica gel G UV active plates. The melting points of compounds were checked by the Buchi melting apparatus and uncorrected.

##### Characterization

<sup>1</sup>H and <sup>13</sup>C NMR spectra were recorded in CDCl<sub>3</sub> on JEOL Resonance ECZ500R NMR spectrometer. Mass spectra were recorded on a SCIEX X500R QTOF mass spectrometry. Raman study was done by Horiba LabRam HR evolution spectrometer. The sample was irradiated with the 633 nm output from a He\Ne laser (30 mW, 1800 grooves/mm grating, slit width 200 μm) and Peltier cooled (-60 °C) CCD detector (model: Sincerity 356399, manufactured by Horiba Instrument Inc.) was used.

##### Photophysical properties

Steady-state UV-visible absorption spectra were measured by Cary 100 Bio, Agilent in the 200–800 nm range. The instrument has photometric linearity till absorbance 3.5 and has a wavelength resolution of 0.2 nm. Fluorescence spectrophotometry (Fluorolog 3-21, Horiba Scientific) was used for fluorescence measurements in solution states.

##### X-ray Diffraction measurement

SCXRD data was collected on a Rigaku: XtaLAB Synergy-i diffractometer Cu-Kα radiation (Kα = 1.54184 Å) for all compounds. All the atoms were refined with anisotropic thermal parameters except the hydrogen atoms. Hydrogen atoms were set to ride on the parent atoms after placing them

in idealized positions around the respective parent atoms. The absence of additional symmetry and voids was confirmed using PLATON (ADDSYM).<sup>1</sup> The structures were solved by direct methods and refined by full-matrix least-squares on F2 using the latest version of SHELX-2019.<sup>2</sup> The packing diagrams were generated using Mercury version 3.1.<sup>3</sup> The refinement converged to the final values of R1 & wR2 and the crystallographic parameter of compound DP, DT, DPM, and DTM are depicted in Table S1. PLATON analyzed the bond lengths, angles, and other geometrical parameters.

**Computational methods:** The theoretical calculations to obtain possible conformational structures of the compounds in the gas phase were performed with a well-known method DFT/B3LYP level of theory available in Gaussian09 software. The 6-31G++(d,p) basis set was used during complete computations. The self-consistent field (SCF) equation was solved iteratively to get the optimized geometries whose energies were found minimal on the potential energy surface.

### Synthetic procedures

**5,6-bis(4-methoxyphenyl)-3-oxo-2,3-dihydropyridazine-4-carbonitrile (PYZ-OMe):** Synthesis of methoxy substituted pyridazinone, a mixture of cyanoacetohydrazide (1 mmol, synthesized by mixing of hydrazine hydrate and cyanoethyl acetate at 0°C), potassium carbonate (1 mmol), and p-Anisil (1 mmol) was added in the 100 ml round bottom flask. The reaction mixture was heated at 110°C for 10-15 minutes. The completion of the reaction was monitored via TLC. The reaction mixture was poured into ice-cold water neutralized by HCl and filtered. The residue was washed with water, dried, and recrystallization from ethyl acetate to obtain a pure product. <sup>1</sup>H-NMR (500 MHz, CDCl<sub>3</sub> δ, ppm): δ 12.72 (s, 1H), 7.16 (d, *J* = 9.3 Hz, 2H), 7.04 (d, *J* = 8.0 Hz, 2H), 6.88 (d, *J* = 8.0 Hz, 2H), 6.75 (d, *J* = 8.0 Hz, 2H), 3.82 (s, 3H), 3.77 (s, 3H). <sup>13</sup>C NMR (126 MHz, CDCl<sub>3</sub> δ, ppm) δ 160.94, 159.77, 157.80, 151.34, 145.86, 131.94, 130.44, 130.29, 126.84, 124.88, 114.09, 113.94, 113.38, 55.05, 54.94. (Fig. S1, a and b)

**5,6-bis(4-methoxyphenyl)-1,2,4-triazin-3(2H)-one (TYZ-OMe):** Synthesis of methoxy substituted triazinone, a mixture of semicarbazide (1 mmol), p-Anisil (1 mmol) and ethanol was added in a 100-round bottom flask. The mixture was heated at 110°C for 2h. The completion of the reaction was monitored via TLC. The reaction mixture was poured into ice-cold water. The residue was washed with water, dried, and recrystallized ethyl acetate to obtain a pure product. <sup>1</sup>H-NMR (500 MHz, CDCl<sub>3</sub> δ, ppm): δ 13.07 (s, 1H), 7.36 (d, *J* = 125.4 Hz, 4H), 6.80 (d, *J* = 9.3 Hz, 4H), 3.82 (s, 6H). <sup>13</sup>C NMR (126 MHz, CDCl<sub>3</sub> δ, ppm) δ 166.45, 162.19, 160.08, 154.30, 142.25, 131.81, 130.10, 127.68, 127.03, 113.77, 113.49, 55.31, 55.21. (Fig. S2, a and b)

**N, N-bis(2-chloroethyl)-4-nitro benzenesulfonamide (BPN):** In 100 ml round bottom flask, p-nitro sulphonyl chloride and Bis(2-Chloroethyl) amine hydrochloride were dissolved in TEA/DCM for 5h at room temperature and completion of reaction monitored via TLC. The reaction mixture was poured into the ice-cold water to obtain the precipitate. The residue was filtered, washed with water, and dried at room temperature. Pyridazinone and triazinone were synthesized using a previously described method.<sup>4,5</sup> <sup>1</sup>H-NMR (500 MHz, CDCl<sub>3</sub> δ, ppm): δ 8.39 (d, *J* = 8.8 Hz, 1H), 8.05 (d, *J* = 8.9 Hz, 1H), 3.71 (t, *J* = 6.7 Hz, 2H), 3.58 (t, *J* = 6.6 Hz, 2H). <sup>13</sup>C-NMR (125 MHz, CDCl<sub>3</sub> δ, ppm) δ 150.47, 144.81, 128.62, 124.71, 51.32, 41.96 (ESI Fig. S3, a and b).

**N, N-bis(2-(5-cyano-6-oxo-3,4-diphenylpyridazin-1(6H)-yl)ethyl)-4-nitrobenzenesulfonamide (DP):** In a 200 ml round bottom flask, anhydrous potassium carbonate (1 mmol) and hetero-aromatic compounds (1 mmol) were added to a small amount of dry DMF, and the mixture was agitated for 30 minutes. After that, compound BPN (0.5 mmol) was added to the mixture, and agitated was maintained for the next 15-20 hours. After completion, the reaction was

monitored via TLC, and DMF was removed in vacuo after the reaction was finished. Column chromatography was applied to isolate the desired products. All the compounds DT, DPM, and DTM were synthesized in a similar fashion presented in Scheme 1. Yield: 85%, M.P.: 142(±1)°C, White solid, <sup>1</sup>H-NMR (500 MHz, CDCl<sub>3</sub> δ, ppm): δ 8.25 (d, J = 8.8 Hz, 1H), 7.98 (d, J = 8.3 Hz, 1H), 7.42 (t, J = 7.2 Hz, 1H), 7.37 – 7.31 (m, 3H), 7.24 (d, J = 7.8 Hz, 2H), 7.17 (d, J = 7.3 Hz, 2H), 7.10 (d, J = 7.4 Hz, 2H), 4.58 (t, J = 5.7 Hz, 2H), 3.92 (t, J = 5.6 Hz, 2H). <sup>13</sup>C-NMR (125 MHz, CDCl<sub>3</sub> δ, ppm) δ 157.15, 151.74, 150.25, 146.74, 145.31, 134.20, 132.41, 130.72, 129.40, 129.34, 129.07, 128.94, 128.48, 128.43, 124.67, 113.89, 113.20, 50.89, 46.18. (Fig. S4, a and b). HRMS(ESI): *m/z*: [M + H]<sup>+</sup> calculated for C<sub>44</sub>H<sub>32</sub>N<sub>8</sub>O<sub>6</sub>S: 801.2244; found: 801.2260. Elemental Analysis for C<sub>44</sub>H<sub>32</sub>N<sub>8</sub>O<sub>6</sub>S: C, 65.99; H, 4.03; N, 13.99%; found C, 65.43; H, 4.16; N, 14.24%.

**4-nitro-N, N-bis(2-(3-oxo-5,6-diphenyl-1,2,4-triazin-2(3H)-yl)ethyl)benzenesulfonamid (DT):** Yield: 72%, M.P.: 155(±1)°C, White solid, <sup>1</sup>H-NMR (500 MHz, CDCl<sub>3</sub> δ, ppm): δ 8.13 (d, J = 8.5 Hz, 1H), 7.91 (d, J = 8.3 Hz, 1H), 7.43-7.39 (dd, J = 15.3, 7.4 Hz, 4H), 7.34 (t, J = 7.4 Hz, 2H), 7.31 – 7.26 (m, 4H), 4.51 (t, J = 5.1 Hz, 2H), 4.00 (t, J = 5.1 Hz, 2H). <sup>13</sup>C-NMR (125 MHz, CDCl<sub>3</sub> δ, ppm) δ 167.10, 153.31, 149.90, 145.41, 143.14, 134.74, 133.92, 131.76, 129.97, 129.58, 128.94, 128.67, 128.32, 128.28, 124.48, 50.82, 45.37. (Fig. S5, a and b) HRMS(ESI): *m/z*: [M + H]<sup>+</sup> calculated for C<sub>40</sub>H<sub>32</sub>N<sub>8</sub>O<sub>6</sub>S: 753.2244; Found: 753.2231. Elemental Analysis C<sub>40</sub>H<sub>32</sub>N<sub>8</sub>O<sub>6</sub>S: C, 63.82; H, 4.28; N, 14.89%; found: c, 63.59; H, 4.51; N, 14.81%.

**N,N-bis(2-(5-cyano-3,4-bis (4-methoxy phenyl) – 6 -oxo pyridazin- 1(6 H)-yl) ethyl)-4-nitrobenzene sulfonamide (DPM):** Yield: 78%, M.P.: 151(±1)°C, Pale yellow solid, <sup>1</sup>H-NMR (500 MHz, CDCl<sub>3</sub> δ, ppm): δ 8.18 (d, J = 7.8 Hz, 1H), 7.94 (d, J = 8.5 Hz, 1H), 7.09 (d, J = 8.6 Hz, 2H), 7.01 (d, J = 8.4 Hz, 2H), 6.83 (d, J = 8.7 Hz, 2H), 6.75 (d, J = 7.9 Hz, 2H), 4.51 (t, J = 5.9 Hz, 2H), 3.89 (t, J = 5.9 Hz, 2H), 3.80 (s, 3H), 3.77 (s, 3H). <sup>13</sup>C-NMR (125 MHz, CDCl<sub>3</sub> δ, ppm) δ 161.46, 160.38, 157.23, 151.41, 150.11, 146.53, 145.40, 130.98, 130.75, 128.45, 126.73, 124.56, 124.53, 114.36, 113.87, 113.71, 112.99, 55.48, 55.41, 50.60, 46.00. (Fig. S6, a and b) HRMS(ESI): *m/z*: [M + H]<sup>+</sup> calculated for C<sub>48</sub>H<sub>40</sub>N<sub>8</sub>O<sub>10</sub>S: 921.2666; Found: 921.2715. Elemental Analysis for C<sub>48</sub>H<sub>40</sub>N<sub>8</sub>O<sub>10</sub>S: C, 62.60; H, 4.38; N, 12.17%; found: C, 62.71; H, 4.30; N, 12.02%.

**N,N-bis(2-(5,6-bis(4-methoxyphenyl)-3-oxo-1,2,4-triazin-2(3H)-yl)ethyl)-4nitrobenzenesulfonamide (DTM):** Yield: 80%, M.P.: 150(±1)°C, Yellow solid, <sup>1</sup>H-NMR (500 MHz, CDCl<sub>3</sub> δ, ppm): δ 8.07 (d, J = 8.0 Hz, 1H), 7.86 (d, J = 9.0 Hz, 1H), 7.43 (d, J = 9.0 Hz, 2H), 7.20 (d, J = 8.8 Hz, 2H), 6.85 (d, J = 8.0 Hz, 2H), 6.76 (d, J = 8.3 Hz, 2H), 4.44 (t, J = 5.7 Hz, 2H), 3.98 (t, J = 5.6 Hz, 2H), 3.82 (s, 3H), 3.80 (s, 3H). <sup>13</sup>C-NMR (125 MHz, CDCl<sub>3</sub> δ, ppm) δ 166.05, 162.83, 160.66, 153.51, 149.85, 145.64, 142.87, 132.26, 130.35, 128.31, 127.11, 126.73, 124.49, 114.24, 113.85, 55.55, 55.49, 50.53, 45.20. (Fig. S7, a and b) HRMS(ESI): *m/z*: [M + H]<sup>+</sup> calculated for C<sub>44</sub>H<sub>40</sub>N<sub>8</sub>O<sub>10</sub>S: 873.2666; found: 873.2749. Elemental Analysis for C<sub>44</sub>H<sub>40</sub>N<sub>8</sub>O<sub>10</sub>S: C, 60.54; H, 4.62; N, 12.84%; found: C, 60.51; H, 4.69; N, 12.77%.

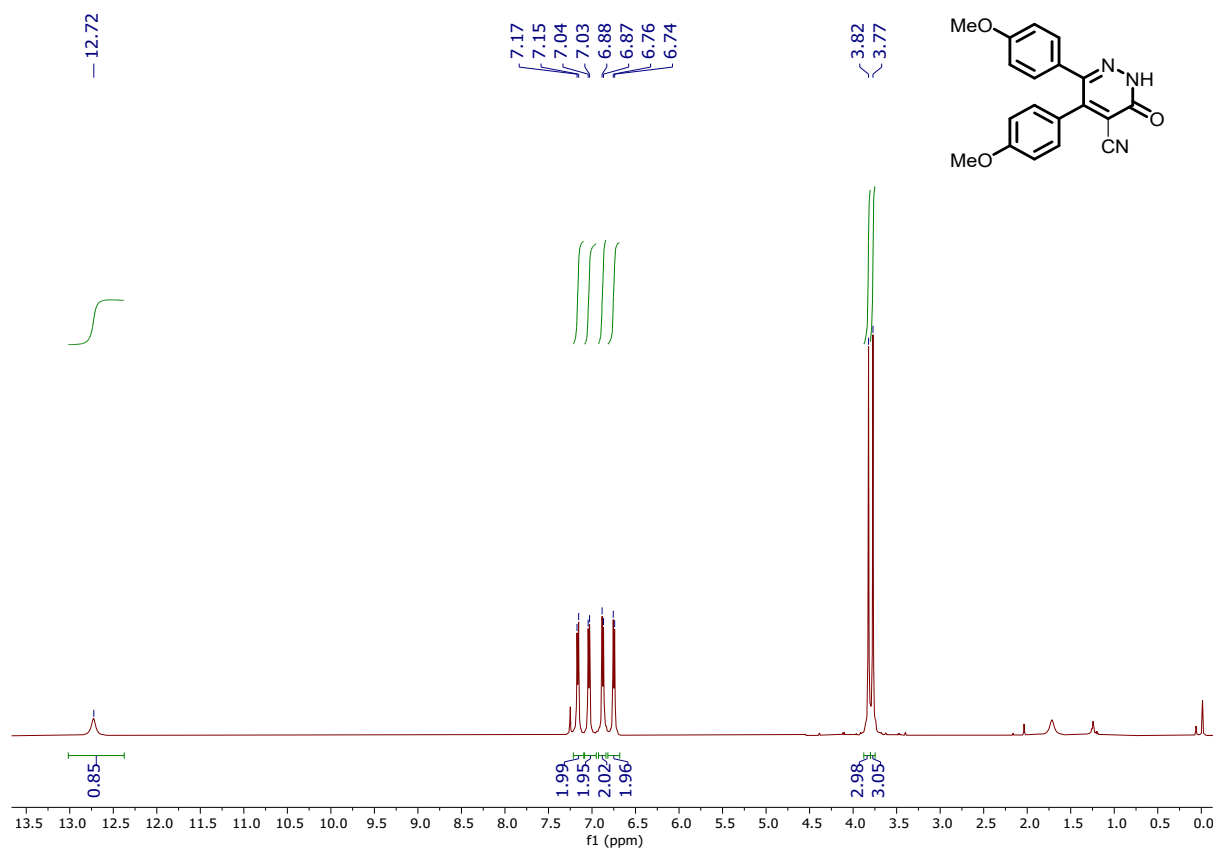

**Fig. S1 (a):** <sup>1</sup>H NMR of 5,6-bis(4-methoxyphenyl)-3-oxo-2,3-dihydropyridazine-4-carbonitrile (Pyz-OMe)

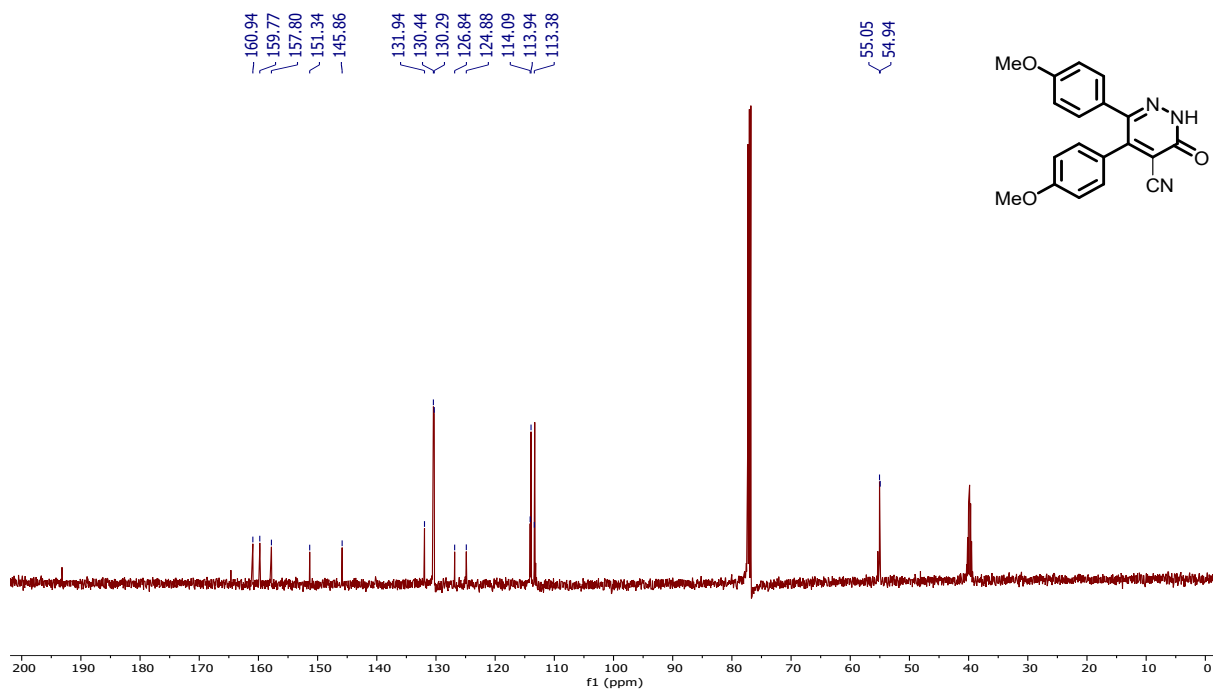

**Fig. S1 (b):** <sup>13</sup>C NMR of 5,6-bis(4-methoxyphenyl)-3-oxo-2,3-dihydropyridazine-4-carbonitrile (Pyz-OMe)

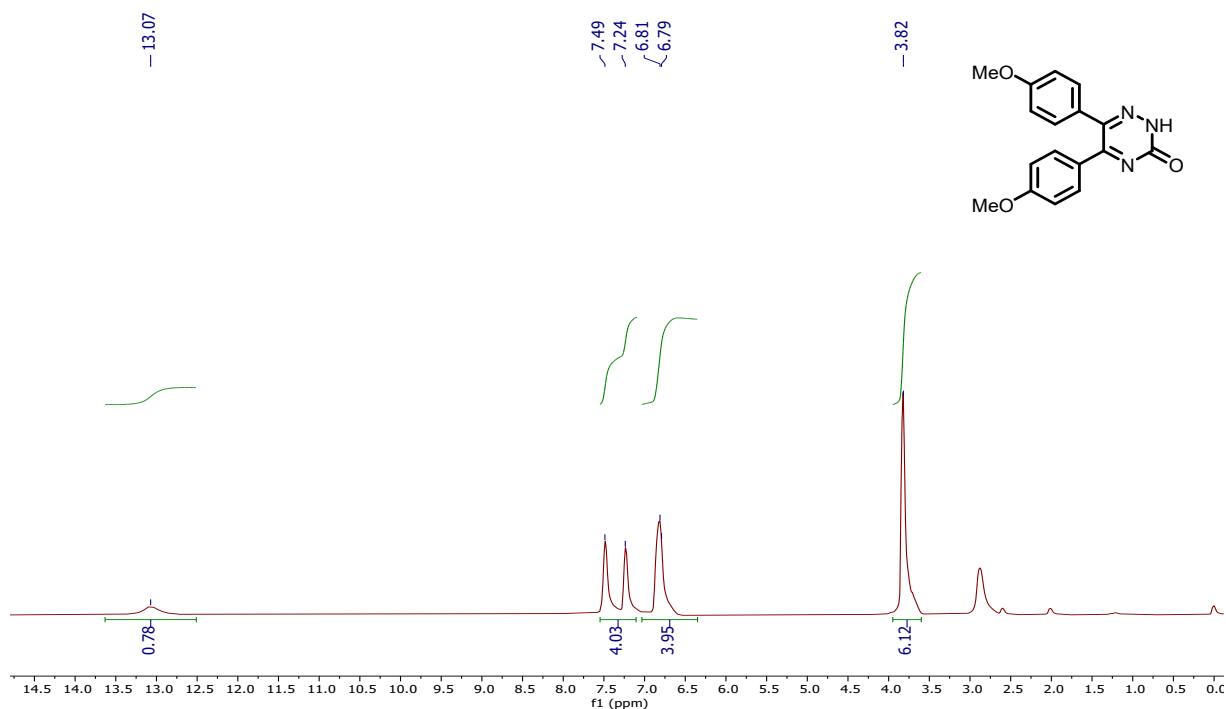

Fig. S2 (a):  $^1\text{H}$  NMR of 5,6-bis(4-methoxyphenyl)-1,2,4-triazin-3(2H)-one (Tyz-OMe)

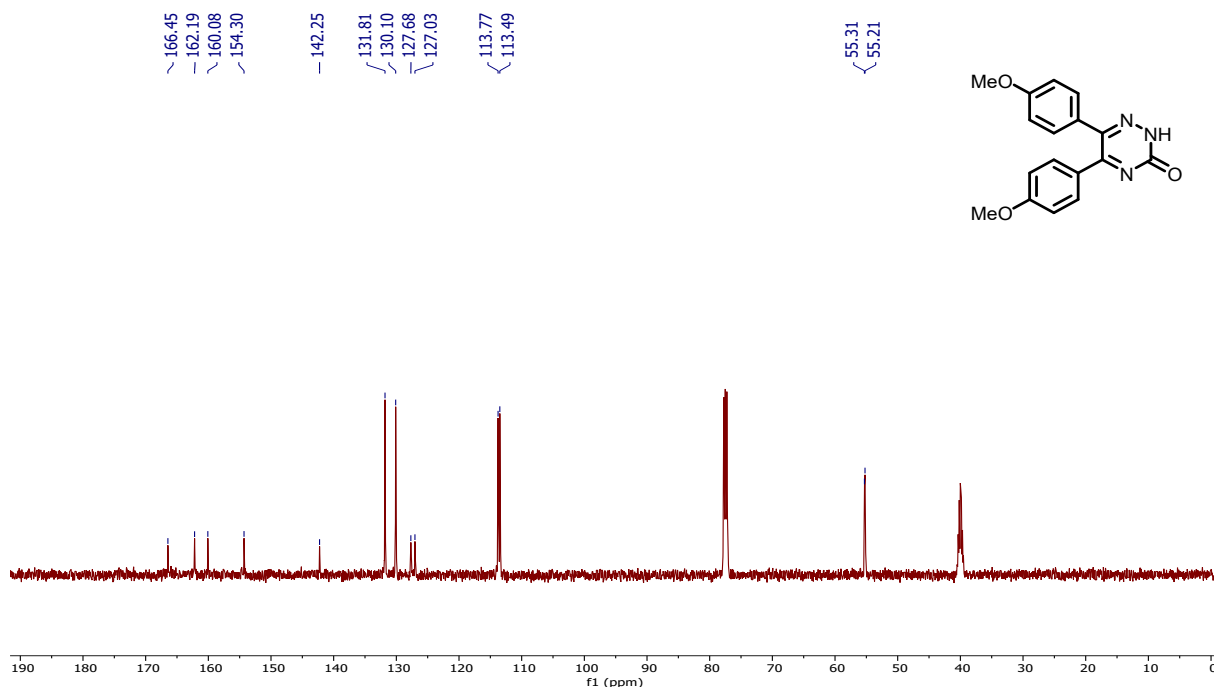

Fig. S2 (b):  $^{13}\text{C}$  NMR of 5,6-bis(4-methoxyphenyl)-1,2,4-triazin-3(2H)-one (Tyz-OMe)

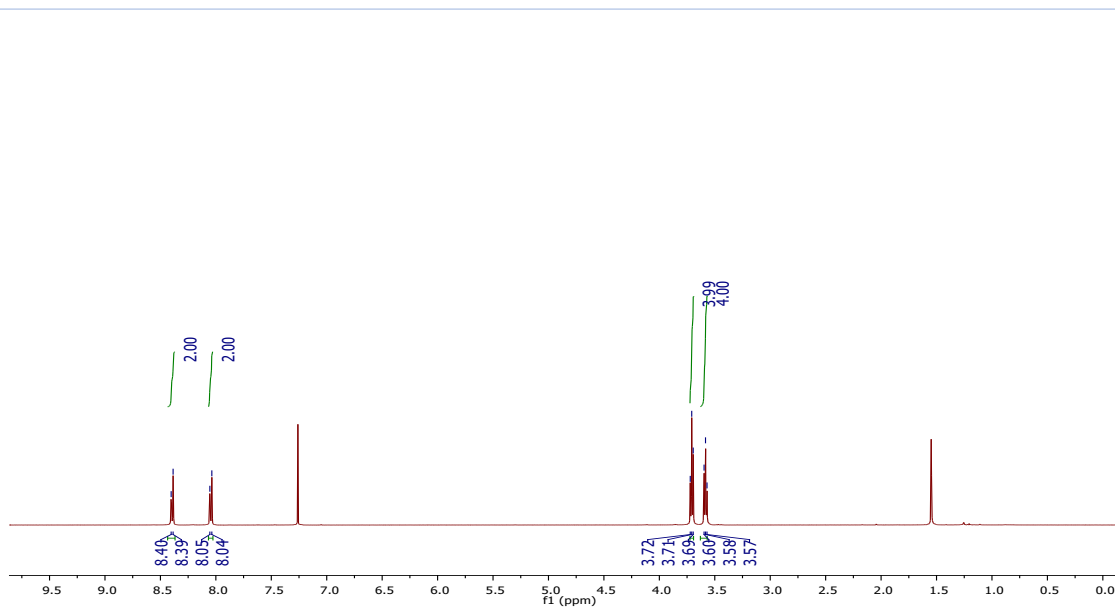

**Fig. S3 (a):** <sup>1</sup>H NMR of N,N-bis(2-chloroethyl)-4-nitrobenzenesulfonamide (BPN)

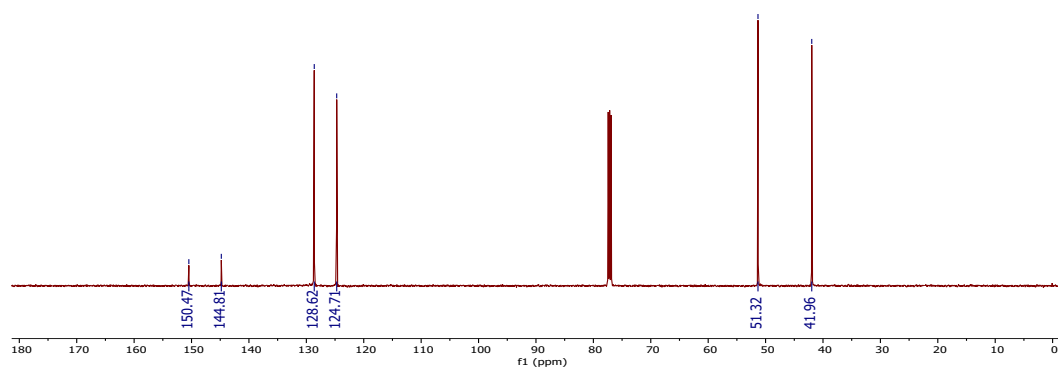

**Fig. S3 (b):** <sup>13</sup>C NMR of N,N-bis(2-chloroethyl)-4-nitrobenzenesulfonamide (BPN)

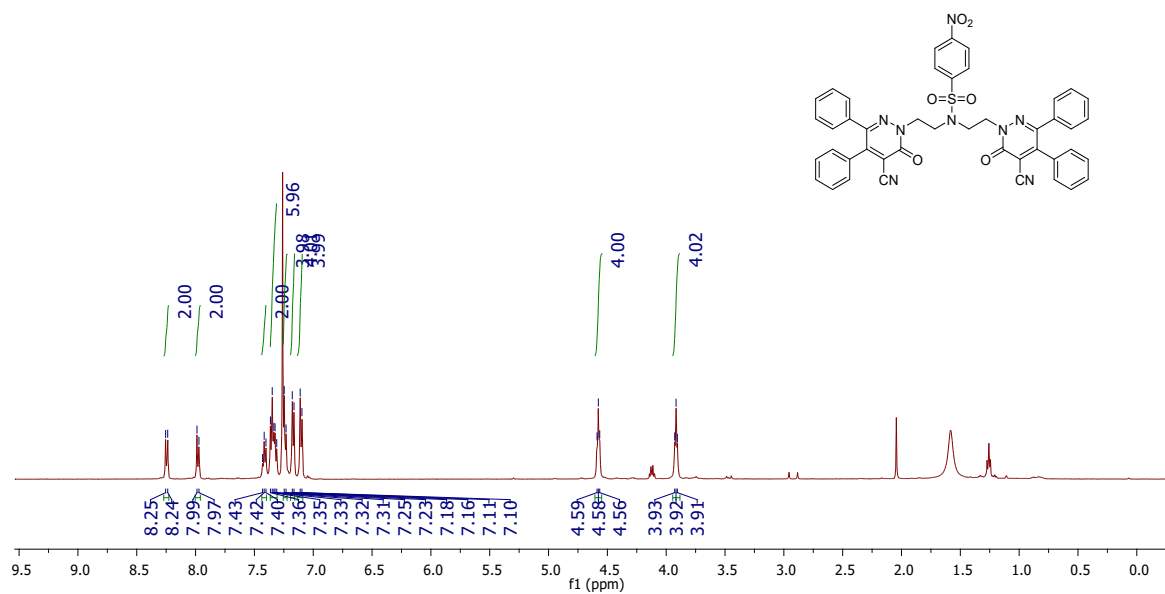

**Fig. S4 (a):**  $^1\text{H}$  NMR of N,N-bis(2-(5-cyano-6-oxo-3,4-diphenylpyridazin-1(6H)-yl)ethyl)-4-nitrobenzenesulfonamide (DP)

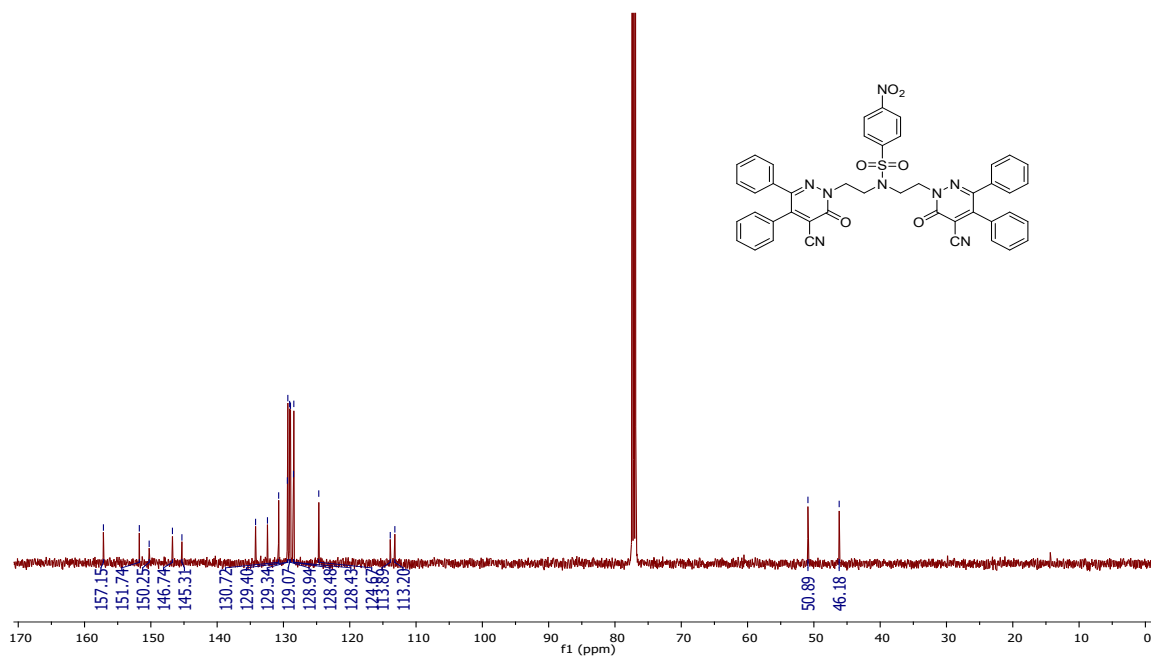

S

**Fig. S4 (b):**  $^{13}\text{C}$  NMR of N,N-bis(2-(5-cyano-6-oxo-3,4-diphenylpyridazin-1(6H)-yl)ethyl)-4-nitrobenzenesulfonamide (DP)

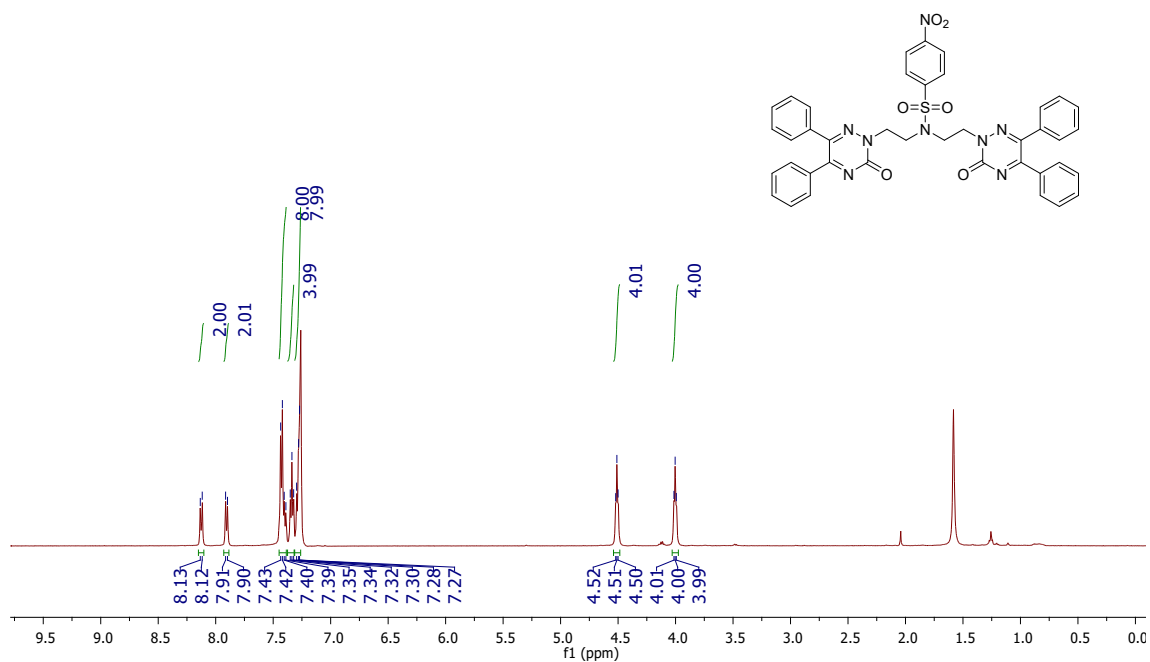

**Fig. S5 (a):** <sup>1</sup>H NMR of 4-nitro-N,N-bis(2-(3-oxo-5,6-diphenyl-1,2,4-triazin-2(3H)-yl)ethyl)benzenesulfonamid (DT).

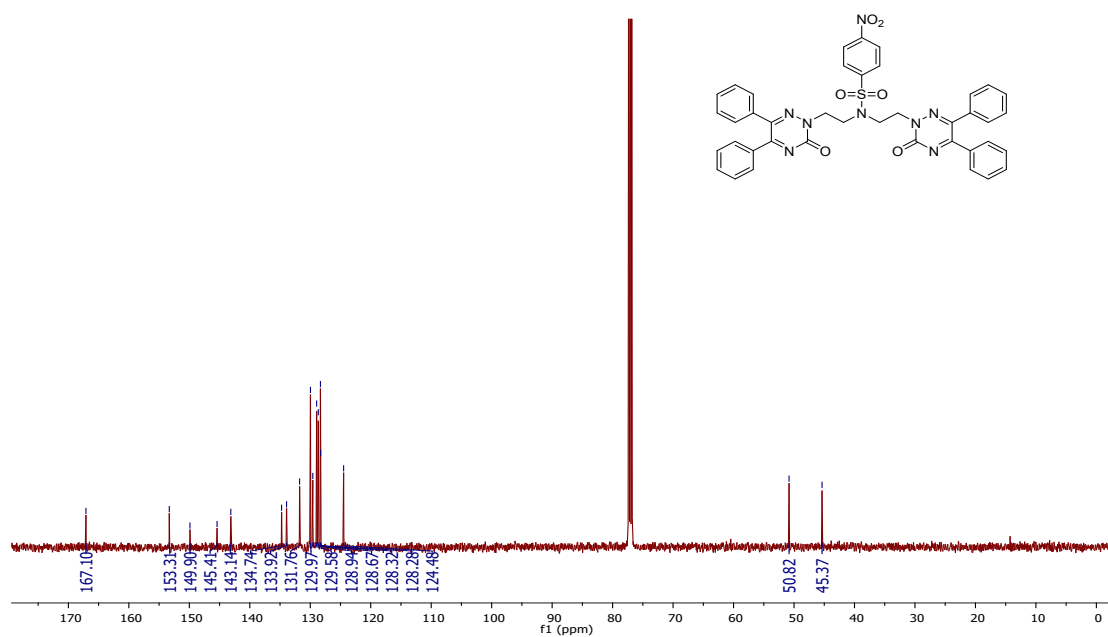

**Fig. S5 (b):** <sup>13</sup>C NMR of 4-nitro-N,N-bis(2-(3-oxo-5,6-diphenyl-1,2,4-triazin-2(3H)-yl)ethyl)benzenesulfonamid (DT).



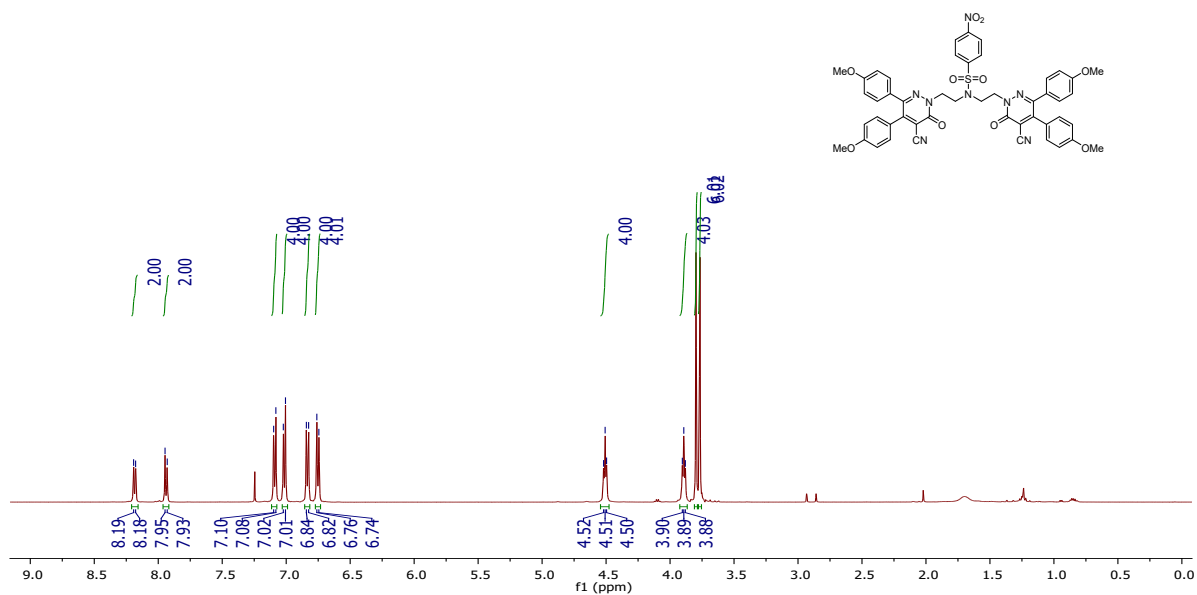

**Fig. S6 (a):**  $^1\text{H}$  NMR of N,N-bis(2-(5-cyano-3,4-bis(4-methoxyphenyl)-6-oxopyridazin-1(6H)-yl)ethyl)-4-nitrobenzenesulfonamide (DPM).

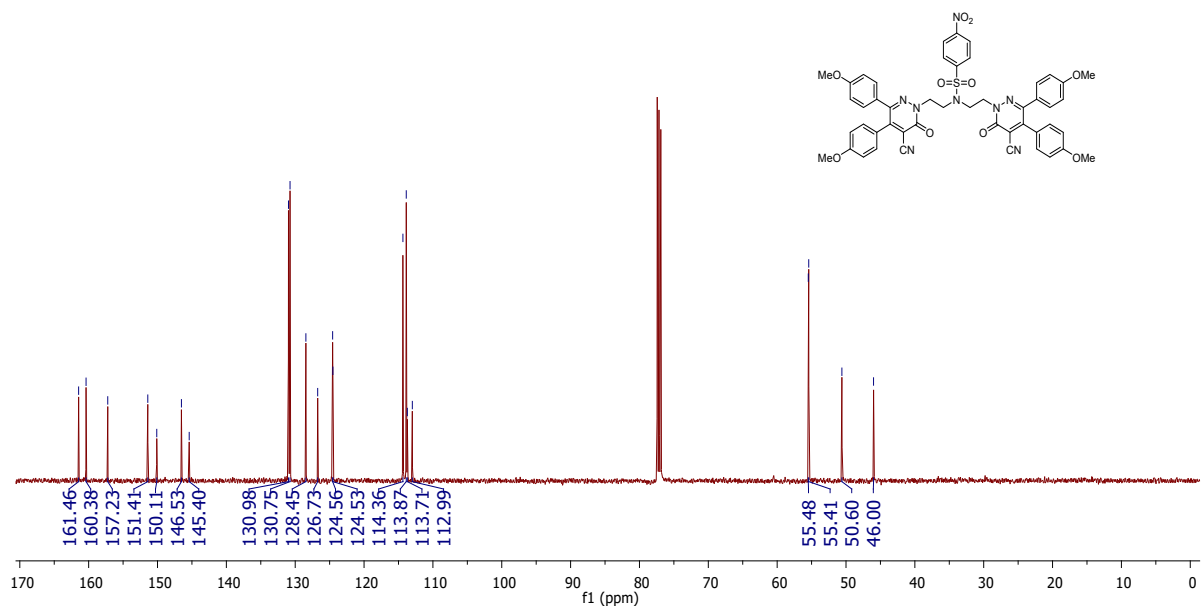

**Fig. S6 (b):**  $^{13}\text{C}$  NMR of N,N-bis(2-(5-cyano-3,4-bis(4-methoxyphenyl)-6-oxopyridazin-1(6H)-yl)ethyl)-4-nitrobenzenesulfonamide (DPM).



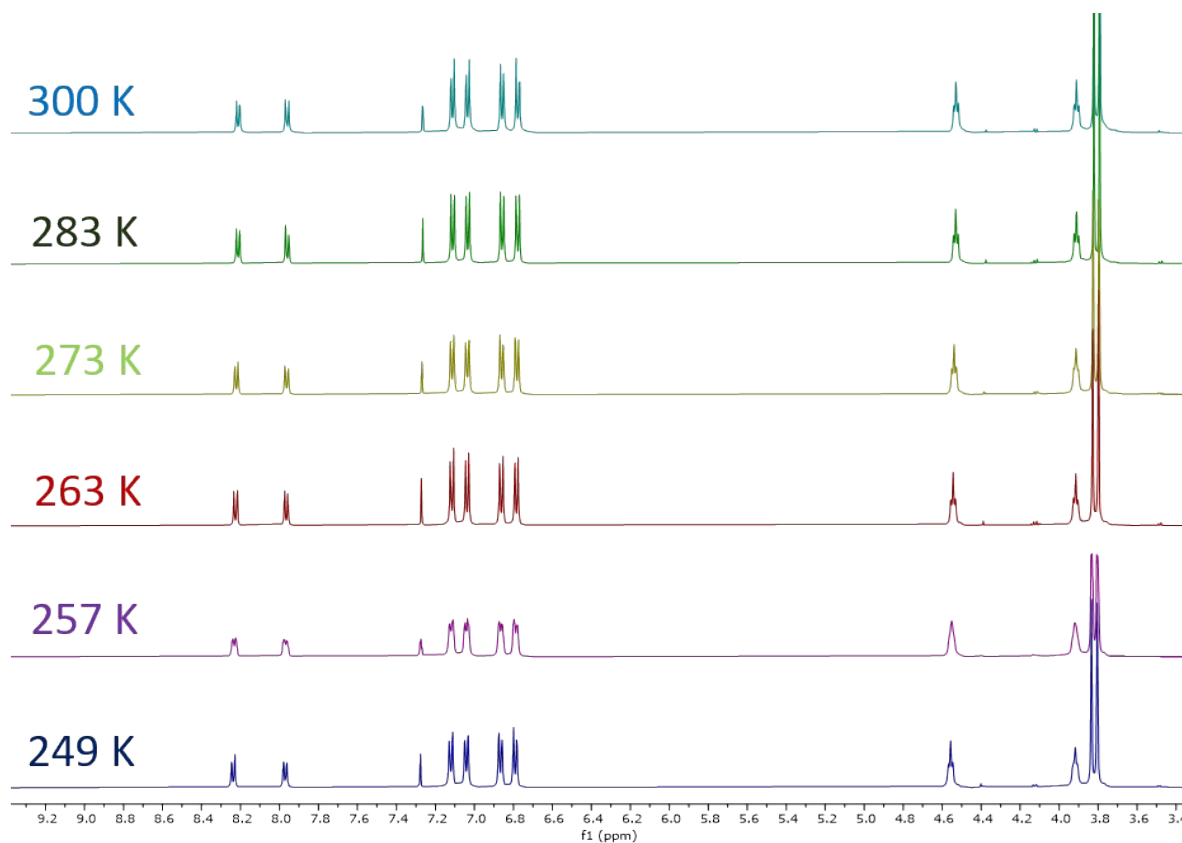

**Fig. S8:** Temperature-dependent  $^1\text{H}$  NMR stacked spectra of the compound DPM, recorded at 500MHz in  $\text{CDCl}_3$  (249-300K).

| <b>Table S1.</b> Crystal data and structure refinement for the compounds.                                                                  |                                                          |                                                             |                                                             |                                                             |
|--------------------------------------------------------------------------------------------------------------------------------------------|----------------------------------------------------------|-------------------------------------------------------------|-------------------------------------------------------------|-------------------------------------------------------------|
| <b>Crystal data</b>                                                                                                                        | <b>DP</b>                                                | <b>DT</b>                                                   | <b>DPM</b>                                                  | <b>DTM</b>                                                  |
| <b>Empirical formula</b>                                                                                                                   | $\text{C}_{44}\text{H}_{32}\text{N}_8\text{O}_6\text{S}$ | $2(\text{C}_{40}\text{H}_{32}\text{N}_8\text{O}_6\text{S})$ | $\text{C}_{48}\text{H}_{40}\text{N}_8\text{O}_{10}\text{S}$ | $\text{C}_{44}\text{H}_{40}\text{N}_8\text{O}_{10}\text{S}$ |
| <b>F.W.</b>                                                                                                                                | 800.83                                                   | 1505.63                                                     | 920.94                                                      | 940.44                                                      |
| <b>CCDC No.</b>                                                                                                                            | 2219084                                                  | 2300044                                                     | 2300051                                                     | 2298730                                                     |
| <b>Crystal System</b>                                                                                                                      | Monoclinic                                               | Monoclinic                                                  | Triclinic                                                   | Triclinic                                                   |
| <b>Space group</b>                                                                                                                         | $P2_1/c$                                                 | $P2_1/c$                                                    | $P\bar{1}$                                                  | $P\bar{1}$                                                  |
| <b>T(K)</b>                                                                                                                                | 293                                                      | 293                                                         | 293(2)                                                      | 293                                                         |
| <b>a (Å)</b>                                                                                                                               | 19.1248 (2)                                              | 19.8963 (9)                                                 | 10.4679(3)                                                  | 11.29667 (11)                                               |
| <b>b (Å)</b>                                                                                                                               | 9.6274 (10)                                              | 23.786 (1)                                                  | 13.6068(4)                                                  | 12.50697 (11)                                               |
| <b>c (Å)</b>                                                                                                                               | 25.5382 (3)                                              | 17.7301 (8)                                                 | 19.0674(7)                                                  | 16.65629 (15)                                               |
| <b><math>\alpha, \beta, \gamma</math> (°)</b>                                                                                              | 90,<br>102.5220 (10),<br>90                              | 90,<br>105.279 (5),<br>90                                   | 69.406(3),<br>81.975(3),<br>67.586(3)                       | 82.1895 (7),<br>74.1486 (8),<br>78.7063 (8)                 |
| <b>V(Å<sup>3</sup>)</b>                                                                                                                    | 4590.30 (9)                                              | 8094.3 (7)                                                  | 2350.19(15)                                                 | 2211.51 (4)                                                 |
| <b>D<sub>calc</sub> (mg m<sup>-3</sup>)</b>                                                                                                | 1.159                                                    | 1.236                                                       | 1.301                                                       | 1.363                                                       |
| <b>Z</b>                                                                                                                                   | 4                                                        | 4                                                           | 2                                                           | 2                                                           |
| <b><math>\mu</math> (mm<sup>-1</sup>)</b>                                                                                                  | 1.06                                                     | 1.17                                                        | 1.169                                                       | 1.24                                                        |
| <b>GOF on F<sup>2</sup></b>                                                                                                                | 1.075                                                    | 1.591                                                       | 1.036                                                       | 1.889                                                       |
| <b>wR (F<sup>2</sup>)</b>                                                                                                                  | 0.035                                                    | <u>0.154</u>                                                | 0.061                                                       | <u>0.094</u>                                                |
| <b>R<sub>w</sub> (F<sub>o</sub><sup>2</sup>)<sup>b</sup></b>                                                                               | 0.109                                                    | 0.449                                                       | 0.188                                                       | 0.324                                                       |
| <sup>a</sup> R1 = $\sum   F_o  -  F_c   / \sum  F_o $ ; <sup>b</sup> wR2 = $[\sum [w( F_o ^2 -  F_c ^2)]^2] / \sum [w( F_o ^2)^2]^{1/2}$ . |                                                          |                                                             |                                                             |                                                             |

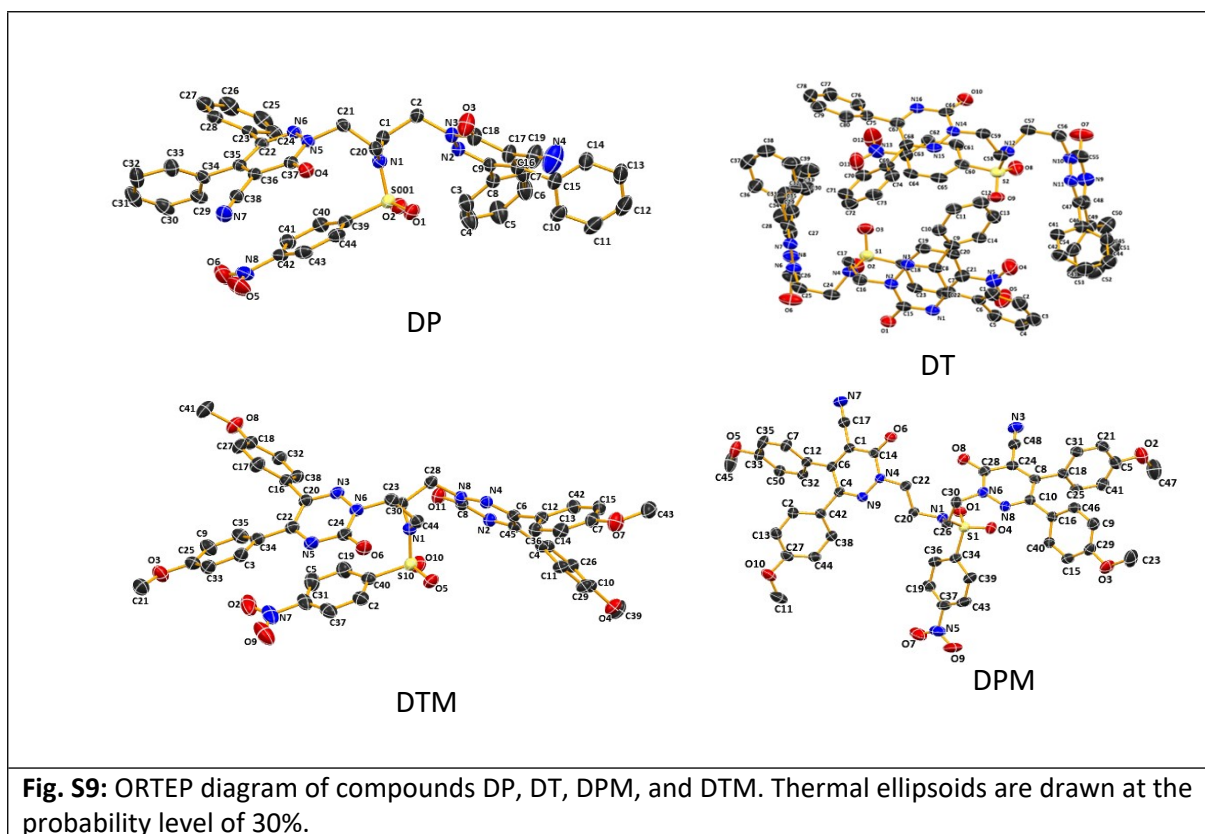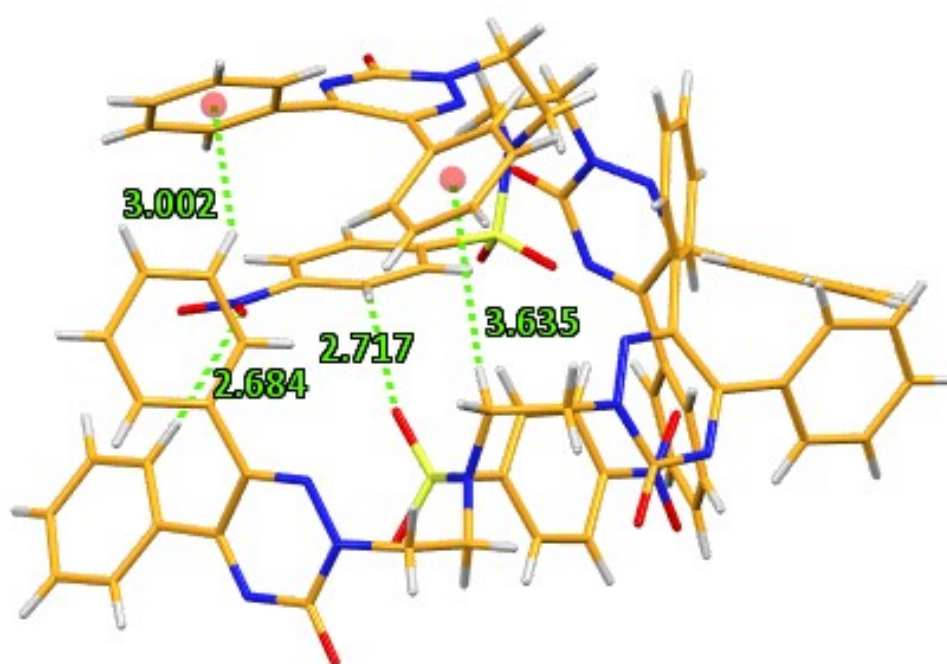

**Table S2:** Representation of key bonds and angles showing intra-molecular interactions in their crystal structure and optimized structures at the DFT/B3LYP level of theory of compounds DP, DT, DPM, and DTM.

| S. No.              | D-H...A                                                       | Crystal structure |       |         | Optimized structure |       |         |
|---------------------|---------------------------------------------------------------|-------------------|-------|---------|---------------------|-------|---------|
|                     |                                                               | H...A             | D...A | D-H...A | H...A               | D...A | D-H...A |
|                     |                                                               | (Å)               | (Å)   | (°)     | (Å)                 | (Å)   | (°)     |
| <b>Compound DP</b>  |                                                               |                   |       |         |                     |       |         |
| 1                   | (Pyridazinone centroid) $\pi \cdots \pi$<br>(centroid of PNS) | 3.717             |       |         | 4.130               |       |         |
| 2                   | (C38N7 centroid) $\pi \cdots \pi$<br>(O5N8O6 centroid)        | 3.751             |       |         | 5.024               |       |         |
| 3                   | C3H3...O2                                                     | 2.757             | 3.652 | 161.95  | 2.632               | 3.630 | 152.62  |
| 4                   | C20H20B...O1                                                  | 2.512             | 2.883 | 102.59  | 2.381               | 2.877 | 105.93  |
| 5                   | C1H1B...O2                                                    | 2.323             | 2.816 | 110.64  | 2.313               | 2.865 | 109.38  |
| 6                   | C43H43... $\pi$ (C38N7 centroid)                              | 3.377             | 3.583 | 95.17   | 3.309               | 3.860 | 112.81  |
| 7                   | C2H2B... $\pi$ (C18O3 centroid)                               | 2.358             | 2.557 | 90.46   | 2.300               | 2.555 | 90.59   |
| 8                   | C1H1A...N6                                                    | 2.694             | 3.407 | 130.39  | 2.766               | 3.585 | 131.28  |
| 9                   | C1H1B...N2                                                    | 2.724             | 3.004 | 97.20   | 2.763               | 3.045 | 94.31   |
| 10                  | C44H44...O1                                                   | 2.547             | 2.900 | 102.91  | 2.573               | 2.962 | 100.13  |
| 11                  | C40H40...O2                                                   | 2.639             | 2.953 | 100.46  | 2.548               | 2.945 | 100.48  |
| 12                  | C14H14B...O48                                                 | 2.373             | 2.781 | 104.65  | 2.227               | 2.774 | 105.45  |
| 13                  | C2H2B...O3                                                    | 2.554             | 2.759 | 91.7    | 2.521               | 2.735 | 89.27   |
| <b>Compound DT</b>  |                                                               |                   |       |         |                     |       |         |
| 1                   | (Triazinone centroid) $\pi \cdots \pi$<br>(PNS)               | 3.654             |       |         | 3.745               |       |         |
| 2                   | (Triazinone centroid) $\pi \cdots \pi$<br>(S1O2 centroid)     | 3.351             |       |         | 3.627               |       |         |
| 3                   | C17H17A...O1                                                  | 2.429             | 2.888 | 108.46  | 2.426               | 2.928 | 106.44  |
| 4                   | C24H24B...O2                                                  | 2.730             | 2.800 | 106.27  | 2.328               | 2.830 | 106.07  |
| 5                   | C40H...N7                                                     | 2.795             | 2.940 | 90.20   | 2.769               | 2.930 | 87.51   |
| 6                   | C34H...N8                                                     | 2.592             | 2.866 | 97.55   | 2.610               | 2.856 | 94.34   |
| 7                   | C25H25...AO6                                                  | 2.460             | 2.741 | 96.26   | 2.444               | 2.750 | 94.34   |
| 8                   | C24H24B...O6                                                  | 2.886             | 3.335 | 109.39  | 2.793               | 3.304 | 108.54  |
| 9                   | C24H24A...O1                                                  | 2.705             | 3.314 | 121.27  | 2.670               | 3.387 | 122.62  |
| 10                  | C16H16A...O1                                                  | 2.422             | 2.773 | 100.77  | 2.773               | 2.414 | 98.75   |
| 11                  | C5H... $\pi$ (O5N5O4)                                         | 3.094             | 3.560 | 112.88  | 2.838               | 3.392 | 111.71  |
| 12                  | C40H... $\pi$ (S1O3)                                          | 3.436             | 4.229 | 144.73  | 3.146               | 4.140 | 152.52  |
| <b>Compound DPM</b> |                                                               |                   |       |         |                     |       |         |
| 1                   | (S1O4 centroid) $\pi \cdots \pi$<br>(Pyridazinone centroid)   | 3.444             |       |         | 3.825               |       |         |
| 2                   | (O2N7O9) $\pi \cdots \pi$ (phenyl ring)                       | 3.468             |       |         |                     |       |         |
| 3                   | C26H26A...N8                                                  | 2.770             | 3.034 | 96.90   | 2.777               | 3.050 | 94.01   |
| 4                   | C26H26A...O4                                                  | 2.505             | 2.872 | 102.44  | 2.426               | 2.917 | 105.70  |
| 5                   | C20H20B...O1                                                  | 2.489             | 2.908 | 105.83  | 2.361               | 2.942 | 111.56  |

|                     |                                   |       |       |        |       |       |        |
|---------------------|-----------------------------------|-------|-------|--------|-------|-------|--------|
| 6                   | C22H22B...O6                      | 2.479 | 2.744 | 95.29  | 2.407 | 2.743 | 95.96  |
| 7                   | C26H26A...π (S1O4 centroid)       | 2.686 | 2.483 | 91.25  | 2.432 | 2.715 | 98.87  |
| 8                   | C2H2...π (Phenyl centroid)        | 3.269 | 3.653 | 107.21 | 3.208 | 3.737 | 110.95 |
| 9                   | C32H32 ...π (Phenyl centroid)     | 3.609 | 3.842 | 97.40  | 3.510 | 2.892 | 102.50 |
| 10                  | C46H46...π (Phenyl centroid)      | 3.471 | 3.839 | 106.47 | 3.366 | 3.794 | 104.97 |
| 11                  | C7H7...π (C17N7 centroid)         | 2.940 | 3.268 | 102.33 | 2.882 | 3.210 | 97.54  |
| 12                  | C31H31...π (C48N3 centroid)       | 3.285 | 3.420 | 90.39  | 2.907 | 3.225 | 97.02  |
| <b>Compound DTM</b> |                                   |       |       |        |       |       |        |
| 1                   | (Triazinone centroid) π...π (PNS) | 3.767 |       |        | 4.414 |       |        |
| 2                   | C5H...O2                          | 2.404 | 2.707 | 98.83  | 2.398 | 2.721 | 95.29  |
| 3                   | C37H...O9                         | 2.438 | 2.724 | 97.75  | 2.407 | 2.724 | 95.06  |
| 4                   | C19H...O10                        | 2.729 | 2.993 | 97.29  | 2.497 | 2.924 | 102.15 |
| 5                   | C2H...O5                          | 2.511 | 2.884 | 104.22 | 2.658 | 2.997 | 97.47  |
| 6                   | C30H30B...O10                     | 2.396 | 2.855 | 108.49 | 2.421 | 2.871 | 103.05 |
| 7                   | C44H44B...O5                      | 2.735 | 2.833 | 108.31 | 2.361 | 2.833 | 104.28 |
| 8                   | C28H28B...O11                     | 2.514 | 2.737 | 92.75  | 2.372 | 2.735 | 97.33  |
| 9                   | C14H...N2                         | 2.505 | 2.783 | 97.46  | 2.512 | 2.808 | 94.19  |
| 10                  | C36H...N4                         | 2.746 | 2.904 | 90.29  | 2.799 | 2.942 | 86.63  |
| 11                  | C38H...N3                         | 2.802 | 2.945 | 89.51  | 2.654 | 2.879 | 90.69  |
| 12                  | C3H...N5                          | 2.558 | 2.828 | 97.11  | 2.462 | 2.770 | 94.66  |
| 13                  | C11H... π (phenyl centroid)       | 3.026 | 3.718 | 132.54 | 3.096 | 3.766 | 120.72 |
| 14                  | C42H... π (phenyl centroid)       | 3.783 | 4.109 | 104.01 | 3.638 | 4.083 | 103.87 |
| 15                  | C35H... π (phenyl centroid)       | 2.899 | 3.579 | 131.08 | 3.109 | 3.855 | 126.58 |
| 16                  | C17H... π (phenyl centroid)       | 3.805 | 4.054 | 98.80  | 3.768 | 4.137 | 107.56 |

**Table S3:** Intermolecular H-bond geometry parameters of compounds DP, DP, DPM, and DTM.

| S. No.             | D-H...A                                 | Crystal Structure |              |                | Symmetry code      |
|--------------------|-----------------------------------------|-------------------|--------------|----------------|--------------------|
|                    |                                         | H...A<br>(Å)      | D...A<br>(Å) | D-H...A<br>(°) |                    |
| <b>Compound DP</b> |                                         |                   |              |                |                    |
| 1                  | C11H...O1                               | 2.633             | 3.296        | 128.78         | 2-x, -1/2+y, 1.5-z |
| 2                  | C6H6...π (Phenyl centroid)              | 2.885             | 3.770        | 159.26         |                    |
| 3                  | C43H43...N2                             | 2.626             | 3.358        | 136.01         | x, -1+y, z         |
| 4                  | C26H726...π (Phenyl centroid)           | 3.715             | 4.254        | 199.80         |                    |
| 5                  | C1H1...N7                               | 2.783             | 3.335        | 116.86         |                    |
| 6                  | C28H28...(C18O2 centroid)               | 3.472             | 3.986        | 117.39         |                    |
| 7                  | C27H27...π (C18O3 centroid)             | 3.573             | 4.045        | 114.24         |                    |
| 8                  | C20H20A...π (Phenyl centroid)           | 3.628             | 4.148        | 116.16         |                    |
| 9                  | C12H12...O2                             | 2.645             | 3.502        | 153.69         | 2-x, -1/2+y, 1.5-z |
| 10                 | C10H10...π (Phenyl centroid)            | 3.529             | 4.275        | 137.01         |                    |
| 11                 | C25H25...π (O6N6O5 centroid)            | 3.475             | 4.310        | 150.73         |                    |
| 12                 | C33H33...O4                             | 2.483             | 3.392        | 165.59         | 1-x, 2-y, 1-z      |
| 13                 | (C28N7 centroid) π...π (C37O4 centroid) | 3.296             |              |                |                    |

|                     |                                                              |       |       |        |                    |
|---------------------|--------------------------------------------------------------|-------|-------|--------|--------------------|
| 14                  | (C38N7 centroid) $\pi \cdots \pi$<br>(Pyridazinone centroid) | 3.794 |       |        |                    |
| <b>Compound DT</b>  |                                                              |       |       |        |                    |
| 1                   | C2H...O7                                                     | 2.336 | 3.260 | 161.11 | x, 1/2-y, 1/2+z    |
| 2                   | C10H... $\pi$ (PNS)                                          | 3.079 | 3.794 | 134.92 |                    |
| 3                   | C13H... $\pi$ (Phenyl centroid)                              | 3.364 | 3.935 | 124.51 |                    |
| 4                   | C12H... $\pi$ (Phenyl centroid)                              | 4.451 | 4.004 | 120.45 |                    |
| 5                   | C54H... O4                                                   | 2.682 | 3.492 | 145.98 | x, y, z            |
| 6                   | C20H ...O9                                                   | 2.691 | 3.498 | 145.82 | x, y, z            |
| 7                   | C42H ... $\pi$ (Phenyl centroid)                             | 3.036 | 3.788 | 138.45 |                    |
| 8                   | C43H... $\pi$ (Phenyl centroid)                              | 3.856 | 4.217 | 106.03 |                    |
| 9                   | C17H17A... $\pi$ (Phenyl centroid)                           | 3.639 | 4.458 | 148.57 |                    |
| 10                  | C10H... $\pi$ (Phenyl centroid)                              | 3.481 | 4.173 | 104.54 |                    |
| 11                  | C77H ...O6                                                   | 2.367 | 3.268 | 169.27 | x, 1/2-y, -1/2+z   |
| 12                  | C71H ... $\pi$ (Phenyl centroid)                             | 3.366 | 3.969 | 124.66 |                    |
| 13                  | C72H ... $\pi$ (Phenyl centroid)                             | 3.430 | 3.991 | 121.17 |                    |
| 14                  | C72H ... $\pi$ (Phenyl centroid)                             | 3.620 | 3.715 | 132.93 |                    |
| 15                  | C56H56A ...O6                                                | 2.313 | 3.238 | 157.82 | 1-x, -1/2+y, 1/2-z |
| 16                  | C25H25A ...O7                                                | 2.265 | 3.154 | 151.89 | 1-x, -1/2+y, 1/2-z |
| 17                  | C23H ...O10                                                  | 2.469 | 3.217 | 137.59 | 1-x, -1/2+y, 1/2-z |
| 18                  | C61H... O1                                                   | 2.445 | 3.219 | 140.89 | 1-x, -1/2+y, 1/2-z |
| 19                  | C80H... O5                                                   | 2.695 | 3.132 | 109.75 | 1-x, -1/2+y, 1/2-z |
| 20                  | C79H... O5                                                   | 2.812 | 3.198 | 105.78 |                    |
| 21                  | C5H ...O12                                                   | 2.679 | 3.111 | 109.21 | 1-x, -1/2+y, 1/2-z |
| 22                  | C16H16A... $\pi$ (Phenyl centroid)                           | 2.789 | 2.625 | 144.62 |                    |
| 23                  | C24H24A... $\pi$ (Phenyl centroid)                           | 3.648 | 4.500 | 147.92 |                    |
| 24                  | C58H58B... $\pi$ (Phenyl centroid)                           | 3.624 | 4.453 | 145.05 |                    |
| <b>Compound DPM</b> |                                                              |       |       |        |                    |
| 1                   | (O9N5O7 centroid) $\pi \cdots \pi$ (PNS)                     | 3.472 |       |        |                    |
| 2                   | (C28O8 centroid) $\pi \cdots \pi$ (C48N3 centroid)           | 3.403 |       |        |                    |
| 3                   | (Pyridazinone centroid)<br>$\pi \cdots \pi$ (PNS)            | 3.858 |       |        |                    |
| 4                   | C45H45A ... $\pi$ (phenyl centroid)                          | 3.478 | 4.085 | 123.35 |                    |
| 5                   | C45H45C ... $\pi$ (phenyl centroid)                          | 3.775 | 4.085 | 102.08 |                    |
| 6                   | C50H ... $\pi$ (phenyl centroid)                             | 3.386 | 4.272 | 159.97 |                    |
| 7                   | C11H11A ... $\pi$ (phenyl centroid)                          | 3.039 | 3.721 | 129.16 |                    |
| 8                   | C20H20B ...O1                                                | 2.526 | 3.478 | 167.17 | 1-x, 1-y, 1-z      |
| 9                   | C36H...O1                                                    | 2.430 | 3.265 | 173.02 | 1-x, 1-y, 1-z      |
| 10                  | C38H...O1                                                    | 2.726 | 3.567 | 150.83 |                    |
| 11                  | C32H...O4                                                    | 2.729 | 3.610 | 158.39 |                    |
| 12                  | C11H11B ... $\pi$ (phenyl centroid)                          | 3.138 | 3.553 | 108.27 |                    |
| 13                  | C43H43 ... $\pi$ (C48N3 centroid)                            | 3.725 | 4.288 | 121.47 |                    |
| 14                  | C11H11C ... $\pi$ (C17N7 centroid)                           | 3.599 | 4.357 | 137.65 |                    |
| 15                  | C2H...O5                                                     | 2.506 | 3.261 | 138.58 | 1-x, 1-y, 2-z      |
| 14                  | C11H11C ... $\pi$ (phenyl centroid)                          | 3.169 | 3.535 | 105.88 |                    |
| 15                  | C20H20A...O9                                                 | 2.544 | 3.349 | 140.44 | -x, 1-y, 1-z       |

|                     |                                           |       |       |        |               |
|---------------------|-------------------------------------------|-------|-------|--------|---------------|
| 16                  | C20H20A ...π (O7N5O9 centroid)            | 2.818 | 3.585 | 135.59 |               |
| 17                  | C26H26B ...π (phenyl centroid)            | 2.912 | 3.811 | 154.58 |               |
| 18                  | C20H20A ...π (phenyl centroid)            | 3.780 | 4.476 | 130.96 |               |
| 19                  | C23H23C ...π (phenyl centroid)            | 3.483 | 4.244 | 137.87 |               |
| 20                  | C23H23B ...π (Pyridazinone centroid)      | 3.704 | 4.031 | 1-3.08 |               |
| 21                  | C23H23A ...π (Pyridazinone centroid)      | 3.707 | 4.031 | 102.85 |               |
| 22                  | C31H ...O6                                | 2.738 | 3.184 | 110.45 | 2-x, -y, 1-z  |
| 23                  | C46H ...O6                                | 2.665 | 3.577 | 166.73 | 2-x, -y, 1-z  |
| 24                  | C26H26B ...π (O9N5O7 centroid)            | 3.370 | 3.955 | 120.72 |               |
| 25                  | C20H20A...π (O9N5O7 centroid)             | 2.818 | 3.585 | 136.59 |               |
| <b>Compound DTM</b> |                                           |       |       |        |               |
| 1                   | (Phenyl centroid) π...π (phenyl centroid) | 3.733 |       |        |               |
| 2                   | (Phenyl centroid) π...π (PNS)             | 3.860 |       |        |               |
| 3                   | (Phenyl centroid) π...π (phenyl centroid) | 3.730 |       |        |               |
| 4                   | C32H ...π (phenyl centroid)               | 3.868 | 4.652 | 143.85 |               |
| 6                   | C28H28A...O4                              | 2.605 | 3.388 | 137.84 | x, -1+y, z    |
| 7                   | C41H41AA...N2                             | 2.725 | 3.533 | 142.23 |               |
| 8                   | C41H41A... π (Triazinone centroid)        | 3.547 | 4.472 | 162.64 |               |
| 9                   | C41H41A...O10                             | 2.703 | 3.379 | 127.96 | x, -1+y, z    |
| 10                  | C42H...O11                                | 2.643 | 3.544 | 163.30 | -x, 1-y, 1-z  |
| 11                  | C28H28A ...π (phenyl centroid)            | 3.748 | 4.394 | 126.47 |               |
| 12                  | C14H... π (Triazinone centroid)           | 2.910 | 3.440 | 117.46 |               |
| 13                  | C28H28B...O2                              | 2.339 | 3.526 | 157.32 | -1+x, y, z    |
| 14                  | C28H28B ...π (O2N7O9 centroid)            | 3.328 | 4.201 | 150.69 |               |
| 15                  | C43H43B...O5                              | 2.750 | 3.467 | 155.80 |               |
| 16                  | C36H ...π (O2N7O9 centroid)               | 3.548 | 3.716 | 93.09  |               |
| 17                  | C44H44B ...π (O2N7O9 centroid)            | 2.851 | 3.750 | 152.82 |               |
| 18                  | C21H21A...O6                              | 2.653 | 3.116 | 110.13 | 2-x, 2-y, -z  |
| 19                  | C21H21B...O6                              | 2.807 | 3.116 | 99.72  | 2-x, 2-y, -z  |
| 20                  | C28H28A...O4                              | 2.609 | 3.389 | 137.64 |               |
| 21                  | C39H39B...O11                             | 2.750 | 3.666 | 157.92 |               |
| 22                  | C41H41A...N2                              | 2.733 | 3.529 | 140.71 | x, -1+y, z    |
| 23                  | C41H41A...O10                             | 2.695 | 3.380 | 128.79 | x, -1+y, z    |
| 24                  | C41H41C...O10                             | 2.560 | 3.359 | 145.45 | 1-x, 2-y, 1-z |
| 25                  | C19H19...O8                               | 2.614 | 3.471 | 153.43 | 1-x, 2-y, 1-z |
| 26                  | C41H41B...O11                             | 2.826 | 3.462 | 139.71 |               |

**Table S4:** Fingerprint plots and decomposed fingerprints showing various interactions of compounds



DP, DT, DPM, and DTM.

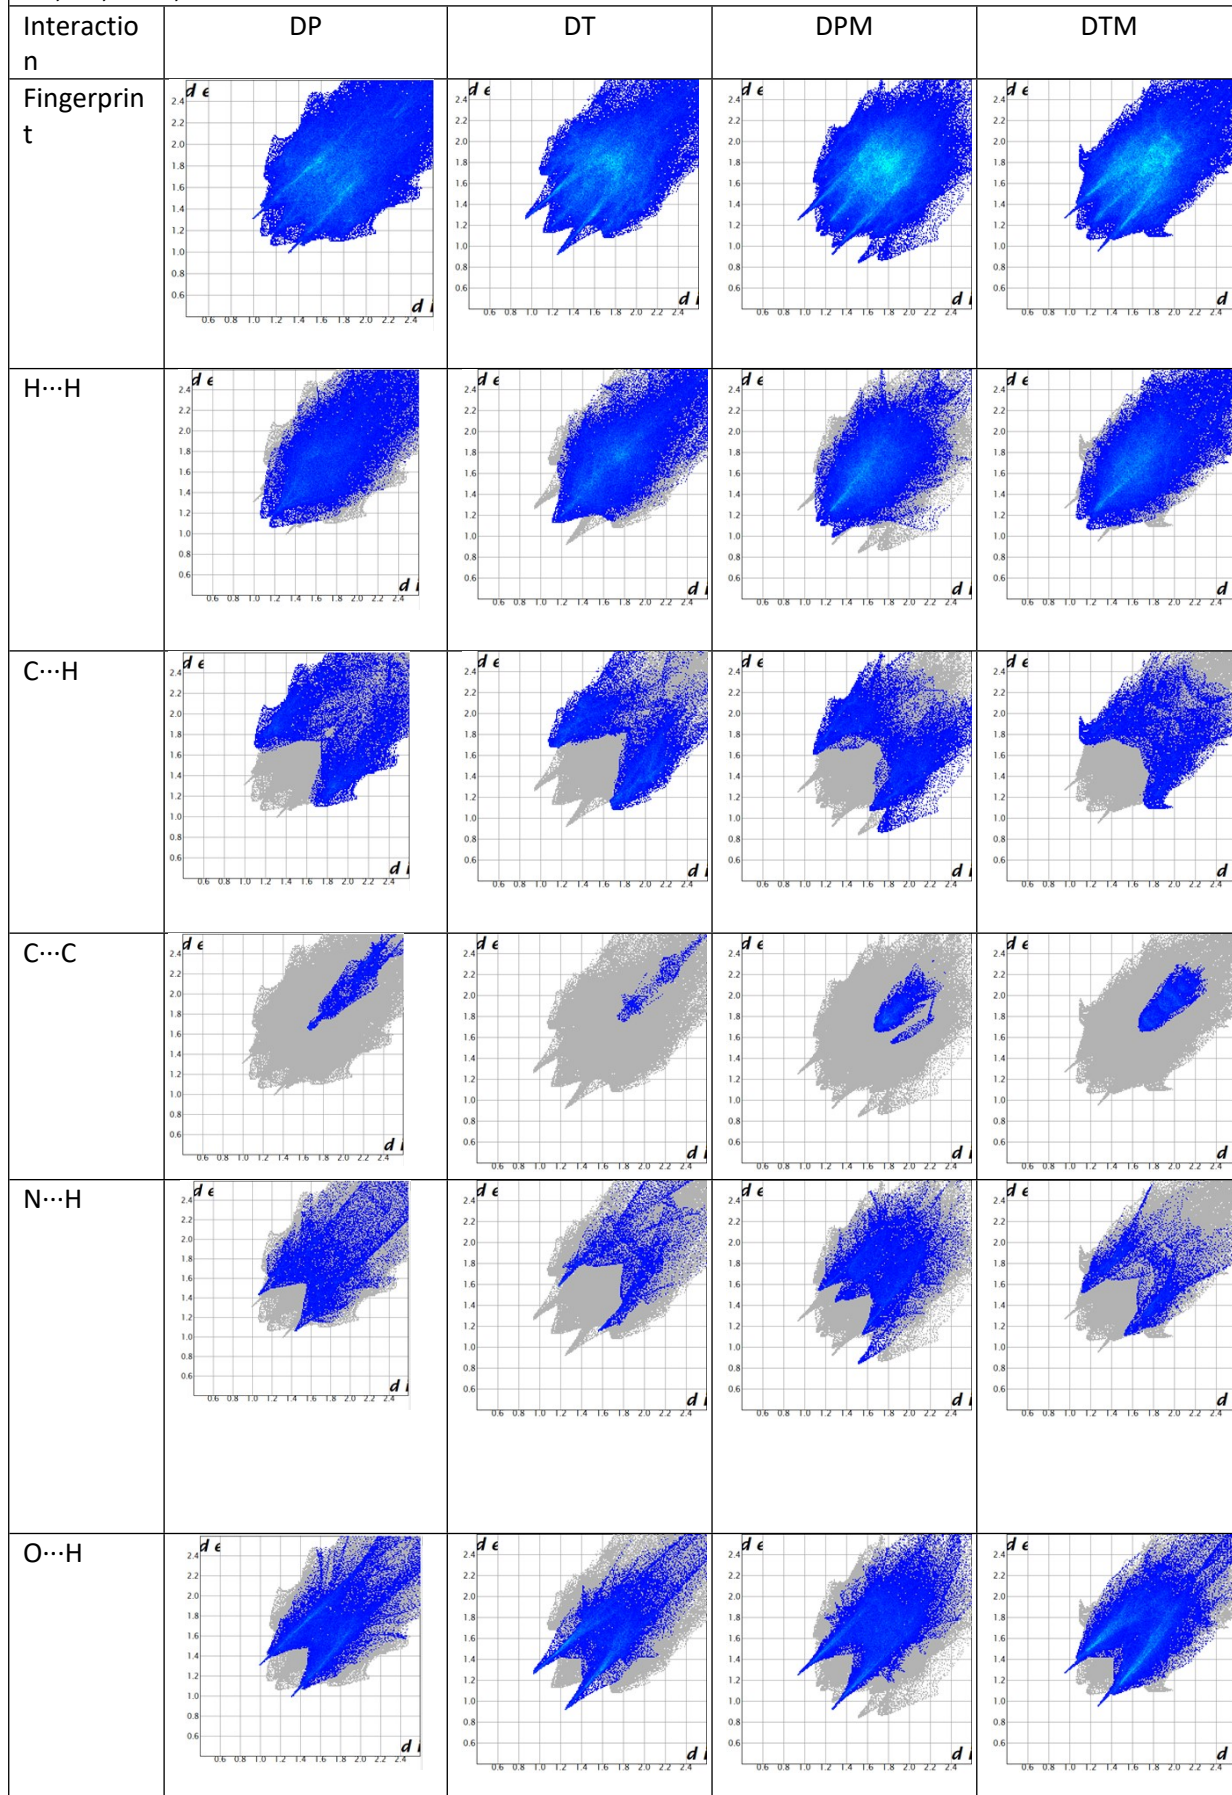

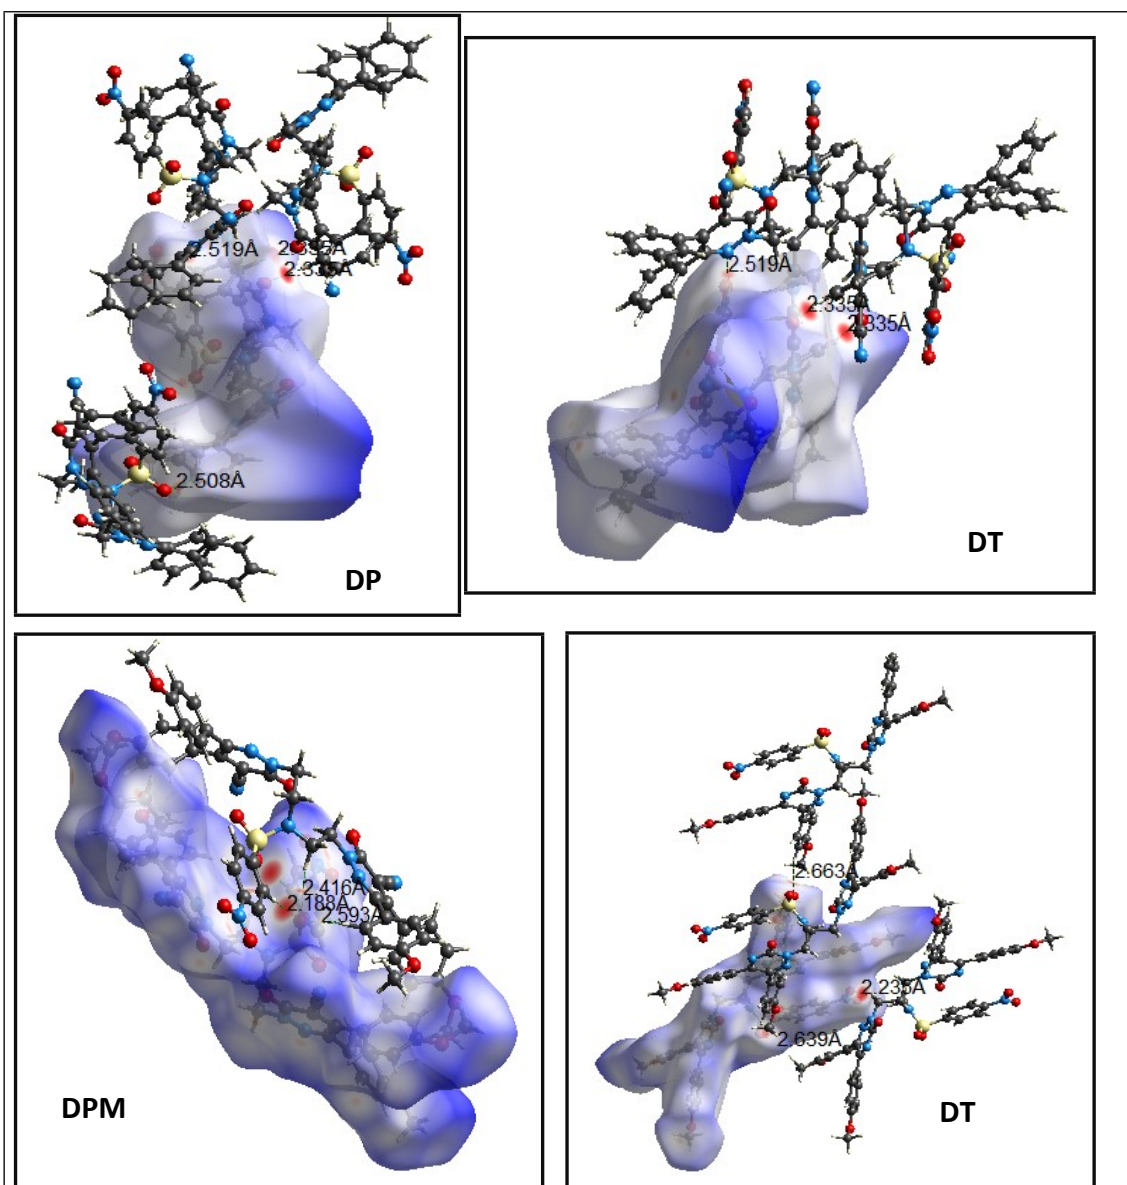

**Fig. S11:** Hirshfeld surfaces of DP, DT, DPM, and DTM mapped with  $d_{\text{norm}}$  surrounded with neighboring molecules associated with close contacts are shown along with distances between the atoms involved.

**Table S5:** Energy  $E$ (eV), Wavelength  $\lambda$ (nm), and Oscillator Strength ( $f$ ) of the selected UV-vis absorption energy transitions at the TD-DFT/B3LYP level for compounds in the gaseous phase acetonitrile.

| DP            |               |         |       |                                                      |
|---------------|---------------|---------|-------|------------------------------------------------------|
| Excited state | $\lambda$ /nm | $E$ /eV | $f$   | Major contribution                                   |
| S1            | 401           | 3.091   | 0.002 | H-1 $\rightarrow$ L (76%), H $\rightarrow$ L (23%)   |
| S2            | 381           | 3.244   | 0.190 | H-1 $\rightarrow$ L+1(41%), H $\rightarrow$ L+2(31%) |

|            |     |       |        |                              |
|------------|-----|-------|--------|------------------------------|
| S3         | 380 | 2.258 | 0.010  | H-1 → L+1 (21%), H → L (37%) |
| S4         | 378 | 3.372 | 0.017  | H → L 9(39%)                 |
| S5         | 360 | 3.441 | 0.004  | H-3 → L (91%)                |
| S7         | 355 | 3.486 | 0.003  | H-1 → L+2(71%)               |
| S8         | 346 | 3.575 | 0.016  | H-2 → L+2(83%)               |
| S9         | 346 | 3.576 | 0.009  | H-3 → L+1(80%)               |
| S12        | 338 | 3.667 | 0.021  | H-5 → L+2(49%)               |
| S13        | 337 | 3.703 | 0.066  | H-2 → L (71%)                |
| S18        | 325 | 3.805 | 0.020  | H-7 → L+2(68)                |
| <b>DT</b>  |     |       |        |                              |
| S3         | 367 | 3.374 | 0.165  | H-1 → L+2(51%)               |
| S2         | 401 | 3.085 | 0.235  | H → L (57%)                  |
| S4         | 362 | 3.418 | 0.023  | H-3 → L (88%)                |
| S5         | 360 | 3.438 | 0.119  | H-1 → L+2(21%), H → L+2(59%) |
| S10        | 342 | 3.624 | 0.035  | H-2 → L (52%)                |
| S13        | 334 | 3.712 | 0.005  | H-9 → L (94%)                |
| S14        | 331 | 3.743 | 0.0004 | H-4 → L (88%)                |
| S19        | 318 | 3.894 | 0.007  | H-7 → L (71%)                |
| S20        | 315 | 3.935 | 0.003  | H-8 → L (80%)                |
| <b>DPM</b> |     |       |        |                              |
| S1         | 456 | 2.717 | 0.009  | H-1 → L (26%), H → L (71%)   |
| S2         | 454 | 2.730 | 0.003  | H-1 → L (73%), H → L (25%)   |
| S3         | 446 | 2.777 | 0.161  | H → L+1 (78%)                |
| S4         | 442 | 2.802 | 0.078  | H-1 → L+2(83%)               |
| S5         | 410 | 3.016 | 0.0004 | H → L+2(92%)                 |
| S6         | 403 | 3.047 | 0.0004 | H-1 → L+2(93%)               |
| S7         | 398 | 3.112 | 0.051  | H-2 → L+1(62%)               |
| S8         | 396 | 3.129 | 0.008  | H-3 → L (81%)                |
| S10        | 392 | 3.149 | 0.057  | H-3 → L+2(80%)               |
| S11        | 360 | 3.438 | 0.001  | H-3 → L+1(96%)               |
| S13        | 338 | 6.658 | 0.035  | H-4 → L (95%)                |
| <b>DTM</b> |     |       |        |                              |
| S1         | 497 | 2.493 | 0.003  | H-3 → L (9%), H → L (90%)    |
| S2         | 461 | 2.685 | 0.006  | H-1 → L (98%)                |
| S3         | 439 | 2.820 | 0.001  | H-3 → L (88%)                |
| S4         | 410 | 3.023 | 0.156  | H → L+1(91%)                 |
| S5         | 403 | 3.075 | 0.197  | H-1 → L+1 (83%)              |
| S6         | 397 | 3.118 | 0.001  | H-2 → L (98%)                |
| S7         | 380 | 3.262 | 0.0002 | H-1 → L+1(90%)               |
| S8         | 374 | 3.309 | 0.0002 | H → L+2(95%)                 |
| S16        | 332 | 3.723 | 0.097  | H-2 → L+1(90%)               |
| S18        | 329 | 3.768 | 0.002  | H-3 → L+2(96%)               |
| S20        | 325 | 3.805 | 0.001  | H-6 → L (79%)                |

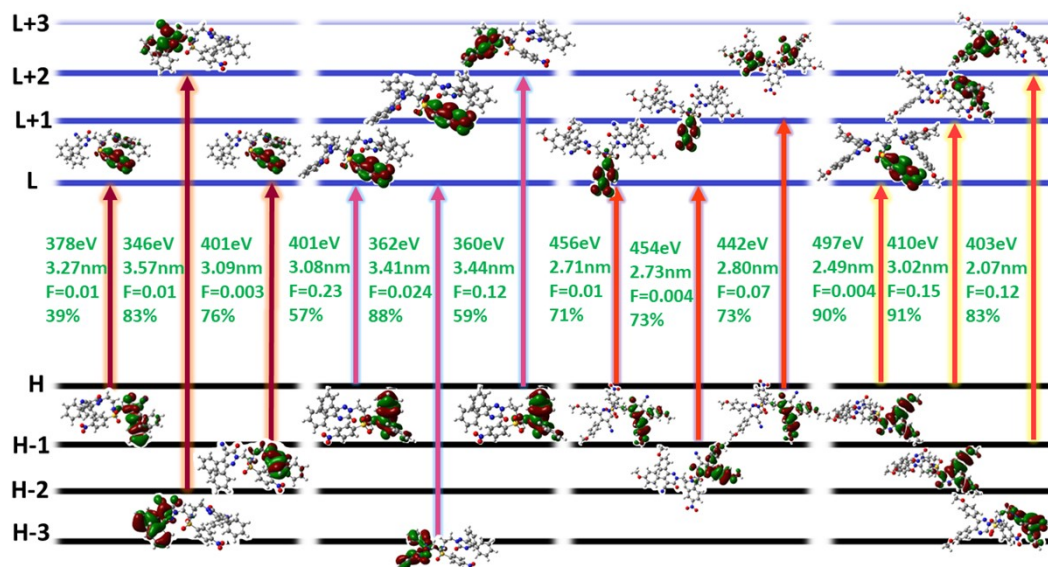

**Fig.: S12:** Energy level diagram representing the dominant transitions and molecular orbitals calculated through TD-DFT calculations performed in acetonitrile via the CPCM model.

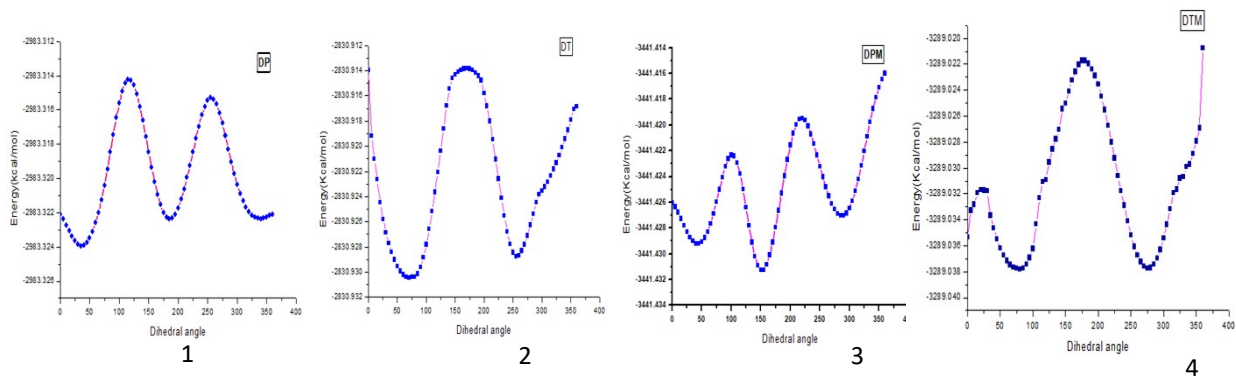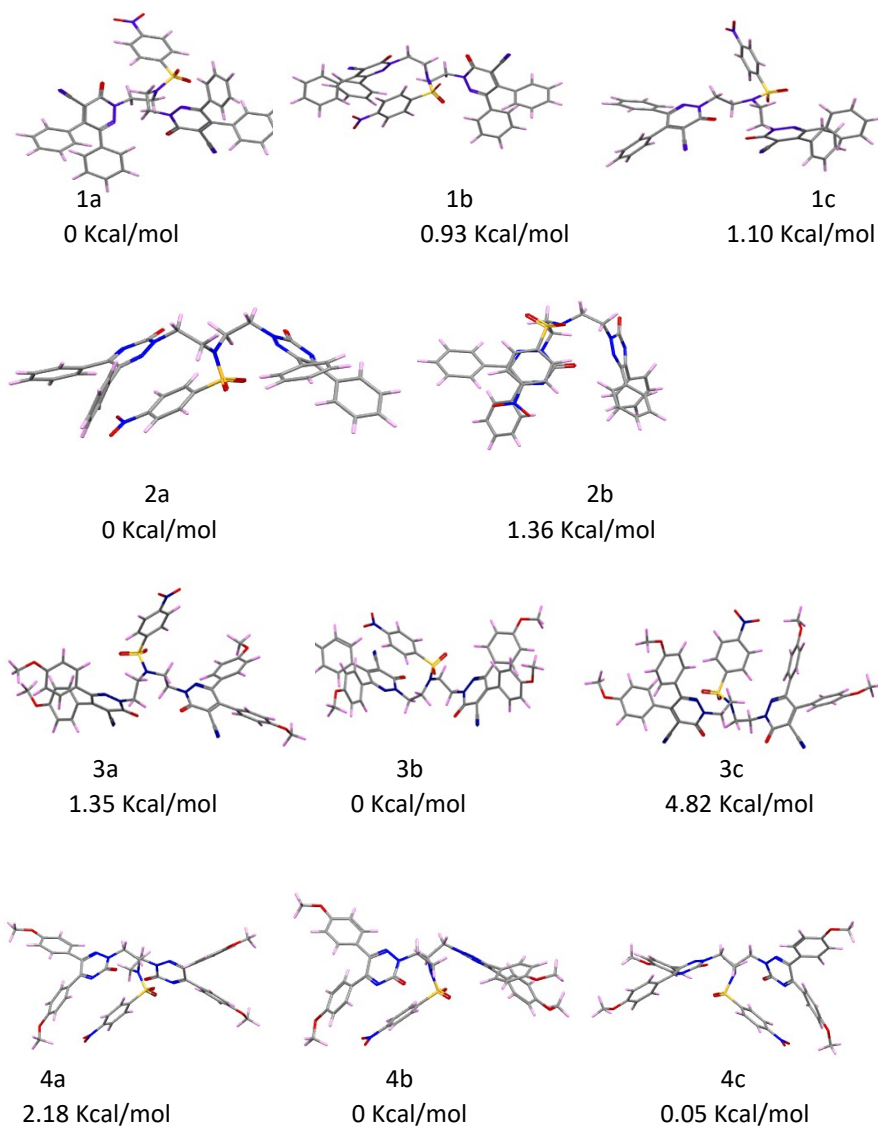

**Fig. S13:** Representation of potential energy surface scans through the linker dihedrals (scans 1, 2, 3, and 4). Different possible conformers of compounds DP, DT, DPM, and DTM were obtained by performing 1-D potential energy scanning.



**Table S6:** Photophysical Properties of DP, DT, DPM, and DTM in several solvents.

| Compounds         | DP                          |                                | DT                           |                                | DPM                          |                                | DTM                          |                                |
|-------------------|-----------------------------|--------------------------------|------------------------------|--------------------------------|------------------------------|--------------------------------|------------------------------|--------------------------------|
|                   | $\lambda_{abs}$<br>(max/nm) | $\lambda_{em}$<br>(max/<br>nm) | $\lambda_{abs}$<br>(max/ nm) | $\lambda_{em}$<br>(max/<br>nm) | $\lambda_{abs}$<br>(max/ nm) | $\lambda_{em}$<br>(max/<br>nm) | $\lambda_{abs}$<br>(max/ nm) | $\lambda_{em}$<br>(max/<br>nm) |
| Toluene           | 358                         | 440                            | 353                          | 457                            | 368                          | 486                            | 360                          | 492                            |
| CHCl <sub>3</sub> | 358                         | 440                            | 353                          | 453                            | 372                          | 501                            | 365                          | 502                            |
| EtOAc             | 358                         | 440                            | 352                          | 451                            | 365                          | 507                            | 360                          | 513                            |
| ACN               | 358                         | 445                            | 352                          | 453                            | 368                          | 542                            | 362                          | 526                            |
| MeOH              | 355                         | 450                            | 354                          | 462                            | 368                          | 555                            | 365                          | 550                            |

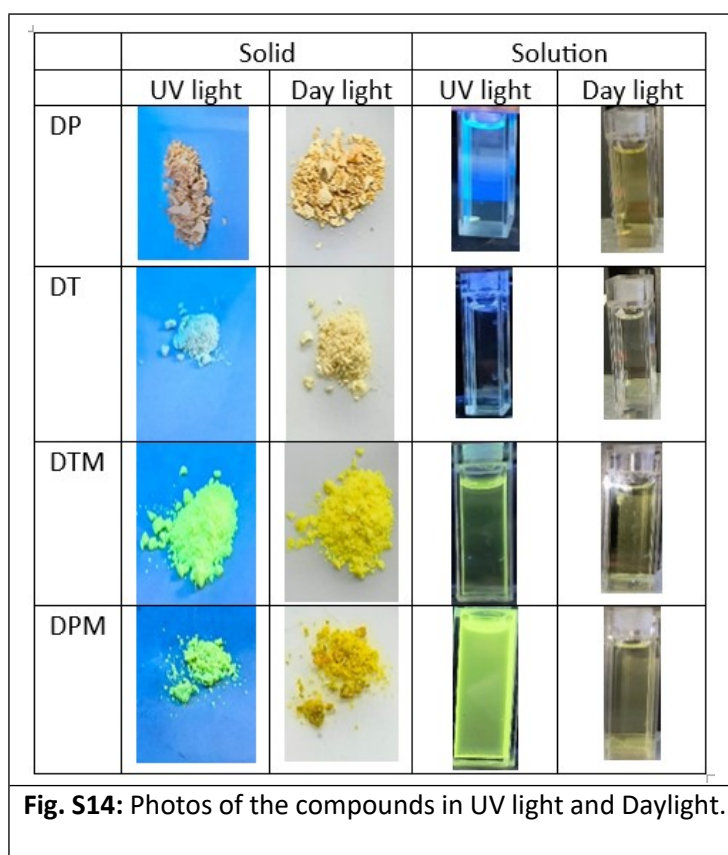

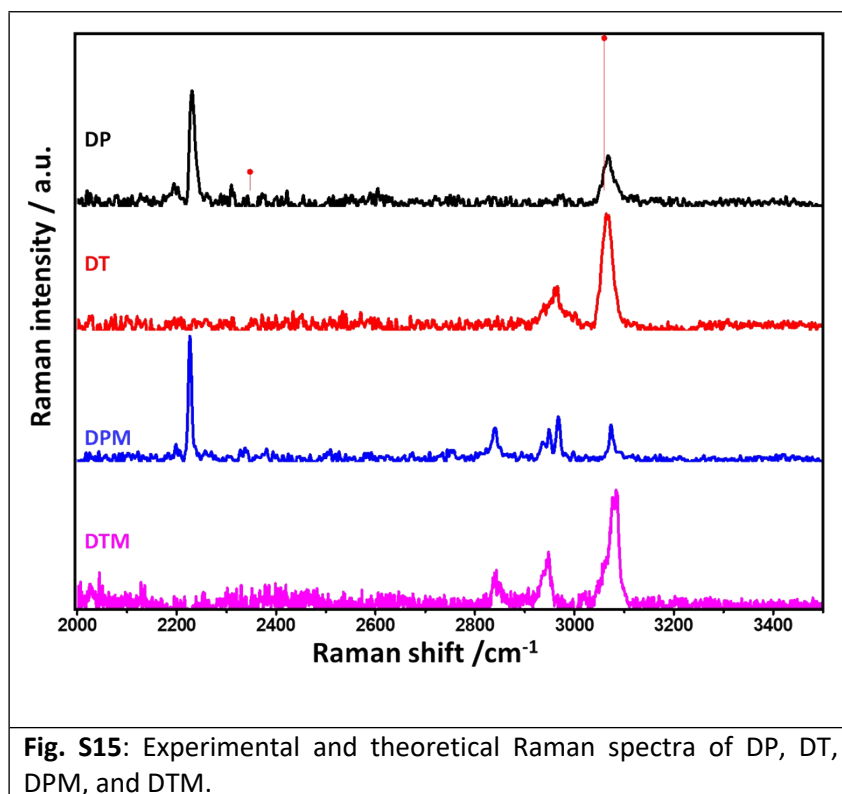

References:

- 1 A. L. Spek, *Acta Cryst.*, Section D 65, 2009, **2** 148-155.
- 2 G.M. Sheldrick, *Acta Cryst. Sect. C Struct. Chem.* 2015, **71**, 3–8.
- 3 a) A Spek, *J. Appl. Cryst.*, 2003, 36, 7-13. (b) Spek, A.; Utrecht University, Utrecht, The Netherlands 2008.
- 4 V. P. Sharma, V. Kumar, P. Sonker, P. Yadav, R. Singh, R. Gnanasekaran, and A. K. Tewari, *Eur JOC*, 2023, **26**, e202301109.
- 5 A. Kumar, R. Kumar, R. Dubey, M. Nidhar, I. Verma, P. Singh and A. K. Tewari, *J. Mol. Struct.*, 2023, **1288**, 135675.
